# Supplementary material for: Liquid Biopsy of Cerebrospinal Fluid Enables Selective Profiling of Glioma Molecular Subtypes at First Clinical Presentation
Source: PubMed Central journal article supplement — Clin Cancer Res. 2023 Jan 17;29(7):1252–66. doi: 10.1158/1078-0432.CCR-22-2903 (PMC10068436; doi:10.1158/1078-0432.ccr-22-2903), 2023-01-17
Supplement: ccr-22-2903_supplementary_information_1_suppms1.pdf [file ccr-22-2903_supplementary_information_1_suppms1.pdf]

## Supplementary Information for

### Liquid biopsy of cerebrospinal fluid enables selective genetic profiling of glioma molecular subtypes at first clinical presentation

Francesca Orzan<sup>1§</sup>, Francesca De Bacco<sup>1,2§</sup>, Elisabetta Lazzarini<sup>3§</sup>, Giovanni Crisafulli<sup>4</sup>, Alessandra Gasparini<sup>3</sup>, Angelo Dipasquale<sup>5,6</sup>, Ludovic Barault<sup>7,2</sup>, Marco Macagno<sup>7</sup>, Pasquale Persico<sup>5,6</sup>, Federico Pessina<sup>5,6</sup>, Beatrice Bono<sup>5</sup>, Laura Giordano<sup>5</sup>, Pietro Zeppa<sup>8</sup>, Antonio Melcarne<sup>9</sup>, Paola Cassoni<sup>10</sup>, Diego Garbossa<sup>8</sup>, Armando Santoro<sup>5,6</sup>, Paolo M. Comoglio<sup>4</sup>, Stefano Indraccolo<sup>3,11</sup>, Matteo Simonelli<sup>5,6,#</sup> and  
Carla Boccaccio<sup>1,2,#,\*</sup>

<sup>1</sup> Laboratory of Cancer Stem Cell Research, Candiolo Cancer Institute, FPO-IRCCS, 10060 Candiolo, Turin, Italy

<sup>2</sup> Department of Oncology, University of Turin Medical School, 10060 Candiolo, Turin, Italy

<sup>3</sup> Basic and Translational Oncology Unit, Veneto Institute of Oncology IOV-IRCCS, 35128 Padua, Italy

<sup>4</sup> IFOM ETS – The AIRC Institute of Molecular Oncology, 20139, Milan, Italy

<sup>5</sup> IRCCS Humanitas Research Hospital, 20089 Rozzano, Milan, Italy

<sup>6</sup> Department of Biomedical Sciences, Humanitas University, 20090 Pieve Emanuele, Milan, Italy

<sup>7</sup> Laboratory of Cancer Epigenetics, Candiolo Cancer Institute, FPO-IRCCS, 10060 Candiolo, Turin, Italy

<sup>8</sup> Department of Neurosciences, University of Turin Medical School, 10126 Turin, Italy

<sup>9</sup> Città della Salute e della Scienza, Turin, Italy

<sup>10</sup> Department of Medical Sciences, University of Turin Medical School, 10126 Turin, Italy

<sup>11</sup> Department of Surgery, Oncology and Gastroenterology, University of Padova, 35123 Padua, Italy

§Equal contribution

#Equal contribution

\*Corresponding author: Carla Boccaccio, Candiolo Cancer Institute, FPO-IRCCS, Str. Prov. 142, Km. 3.95, 10060 Candiolo, Turin, Italy. Phone: +39-011-9933208. E-mail: carla.boccaccio@ircc.it.

**Running title.** Liquid biopsy of cerebrospinal fluid for glioma diagnosis

## **Inventory of Supplementary Information**

**1.**

### **Supplementary Figures**

**Supplementary Fig. S1, related to Fig. 2D**

**Supplementary Fig. S2, related to Fig. 3E**

**Supplementary Fig. S3, related to Fig. 3G**

**Supplementary Fig. S4, related to Fig. 4C**

**2.**

### **Supplementary Tables**

**Supplementary Table S1, related to Fig. 1A and 2C**

**Supplementary Table S2, related to Fig. 1B**

**Supplementary Table S3, related to Fig. 2A-D**

**Supplementary Table S4, related to Fig. 2E and F**

**Supplementary Table S5, related to Fig. 2I**

**Supplementary Table S6, related to Fig. 3A**

**Supplementary Table S7, related to Fig. 3B**

**Supplementary Table S8, related to Fig. 3C-E**

**Supplementary Table S9, related to Fig. 3E**

**Supplementary Table S10, related to Fig. 3G and Supplementary Fig. S3**

**Supplementary Table S11, related to Fig. 4C**

**Supplementary Table S12, related to Fig. 4F and G**

**Supplementary Table S13, related to Fig. 5B and C**

**3.**

**Description of Supplementary Data 1**

**Description of Supplementary Data 2**

**Description of Supplementary Data 3**

**4.**

**Supplementary Materials and Methods**

**5.**

**Supplementary References**

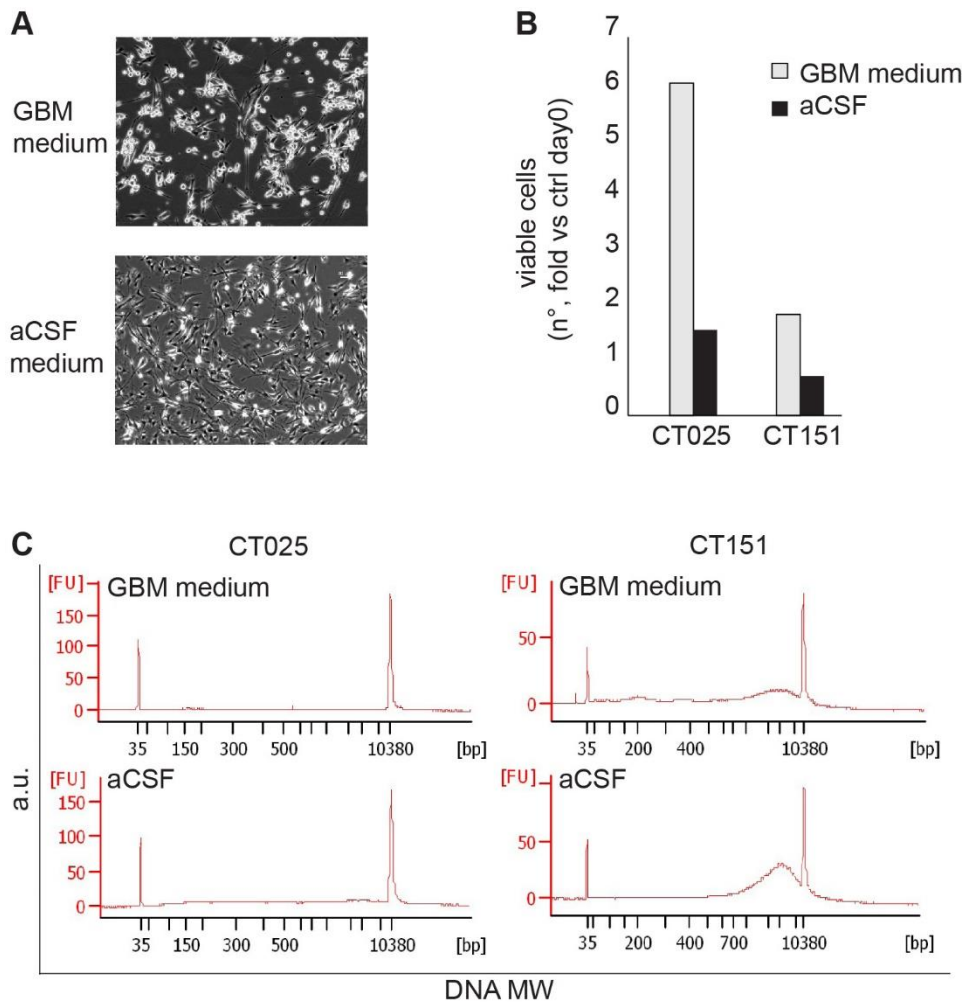

**Supplementary Fig. S1 (related to Fig. 2D).** Cell viability and DNA release in CSF. **A**, Representative images of CT025 GBM primary cells kept for 6 days in conventional culture medium (GBM medium, top) or in artificial cerebrospinal fluid (aCSF). **B**, Bar graph showing viability of CT025 and CT151 GBM primary cells after 6 days of culture in GBM medium or aCSF. Cells were counted and dead cells were excluded by trypan blue staining. Cell number relative increase vs. day 0 is shown. **C**, Molecular weight (MW) analysis of DNA released by CT025 or CT151 GBM primary cells in the supernatant after 6 days of culture in GBM medium or aCSF (Bioanalyzer output). In GBM medium, DNA release is minimal. In aCSF, high-MW DNA, typically associated with cell necrosis, is found, while low-MW DNA, resulting from apoptotic DNA nucleosomal fragmentation, is absent. bp = base pairs.

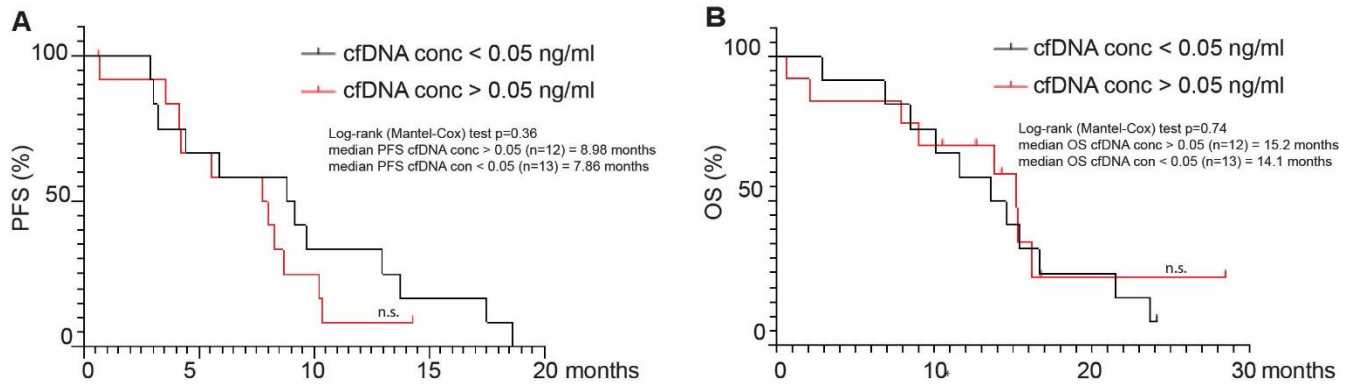

**Supplementary Fig. S2 (related to Fig. 3E).** LP-CSF DNA and prognostic correlations (Cohort 2). **A** and **B**, Correlation between cfDNA concentration in LP-CSF and progression free survival (PFS, **A**) and overall survival (OS, **B**), both not significant. 0.05 ng/ml: median cfDNA concentration in Cohort 2.

**A MG2063 (CSF cfDNA + CSF cellular DNA)**

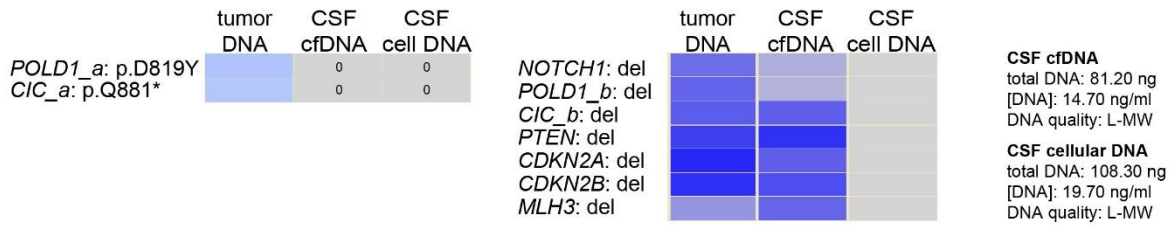

**B MG1927 (CSF cfDNA)**

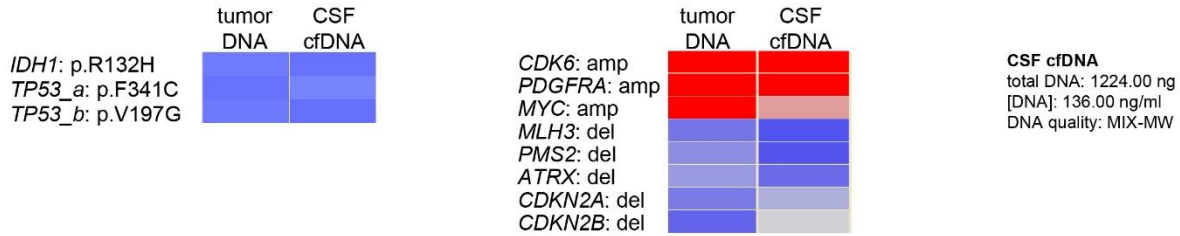

**C MG1942 (CSF cfDNA)**

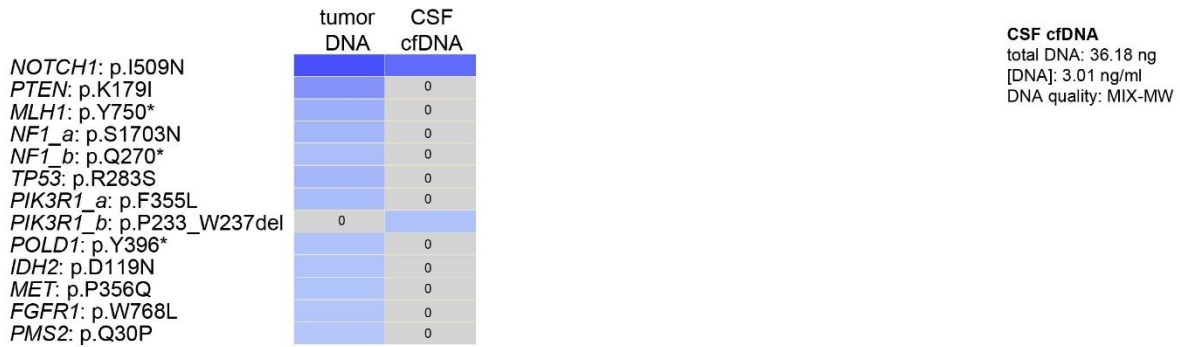

**D MG2170 (CSF cfDNA)**

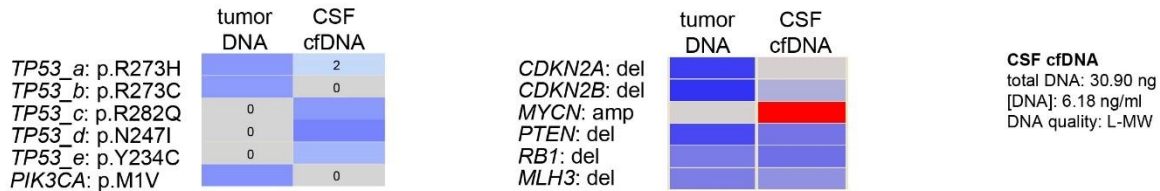

**E MG2166 (CSF cellular DNA)**

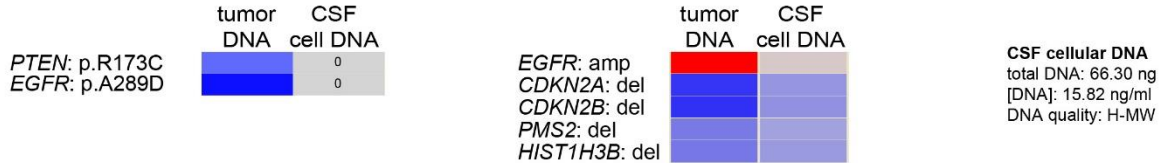

**F MG2062 (CSF cellular DNA)**

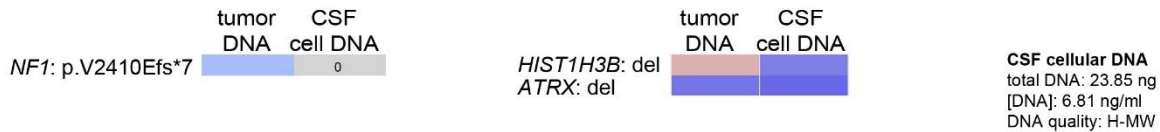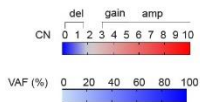

**Supplementary Fig. S3 (related to Fig. 3G).** Cohort 2, overall NGS analysis of tumor tissues and CSFs. **A-F**, Comparative analysis of DNA extracted from the indicated cases, each including tumor tissue and CSF (cfDNA from supernatant and/or cellular DNA from pellet). CSF DNA total quantity, concentration (ng/ml) and quality (L-MW: low-MW; H-MW: high-MW; MIX-MW: mixed high and low molecular weight) were indicated. Heatmaps represent gene copy number (CN) and variant allele frequency (VAF). VAF < 10% were reported.

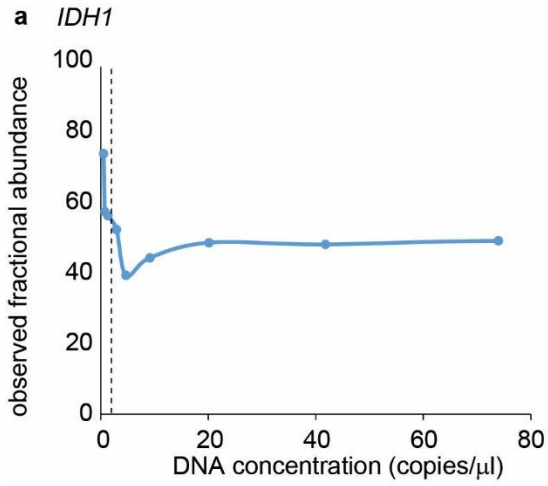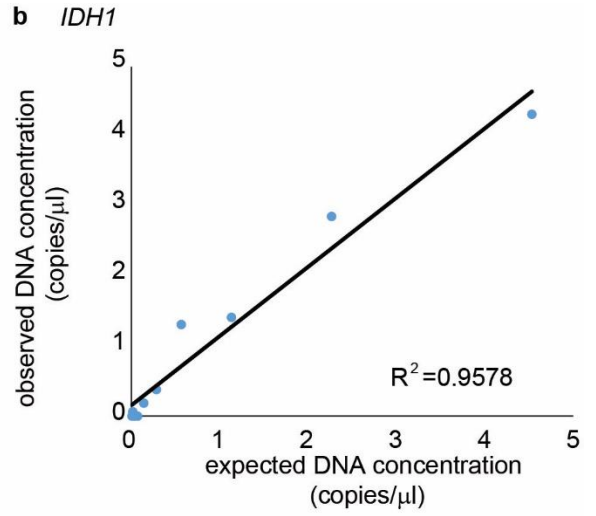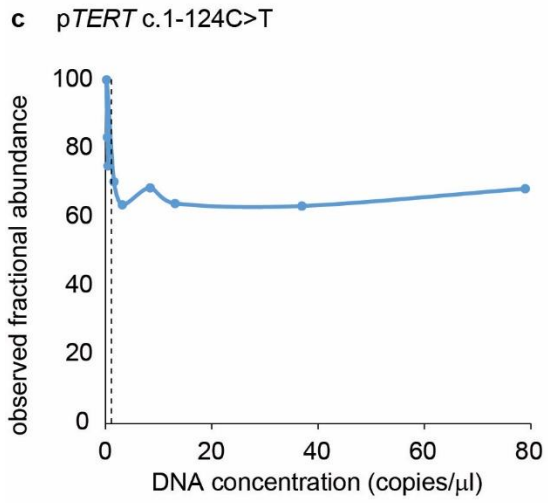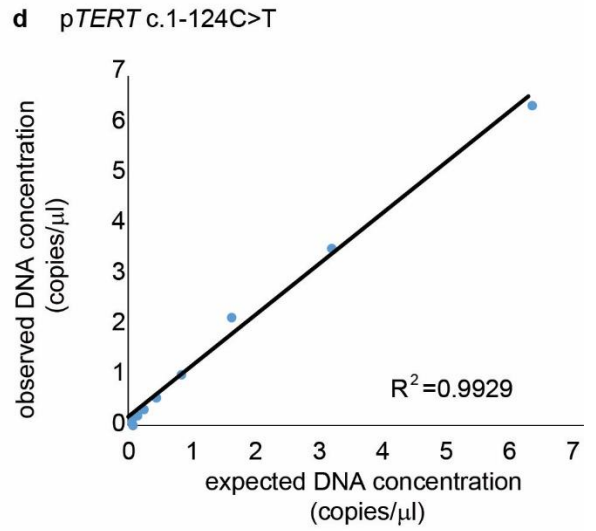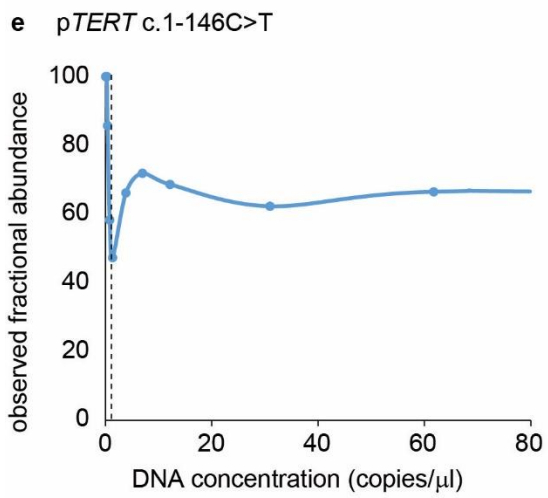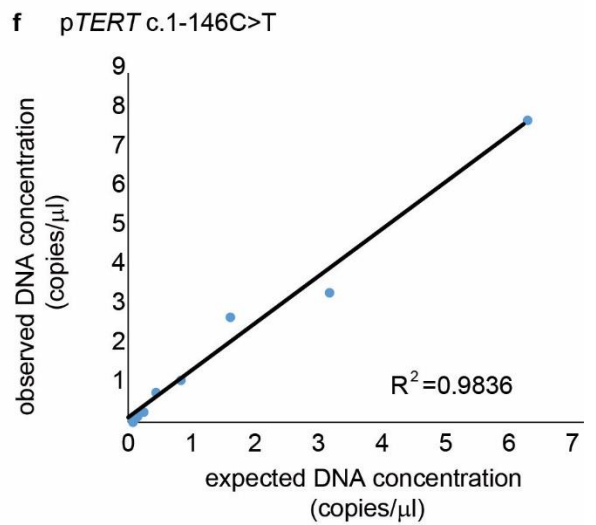

**Supplementary Fig. S4 (related to Fig. 4C).** Linearity of DNA quantification across a low concentration dynamic range. **A**, A range of input cell line DNA concentrations (0.1 to 80 copies/ul of reaction, sum of WT and mutant) was analyzed using the *IDHI* p.R132H in CT075 tumor. **B**, The average absolute output for the DNA concentrations (expected versus observed) is shown for the *IDHI* p.R132H. **C**, A range of input cell line DNA concentrations (0.1 to 80 copies/ul of reaction, sum of WT and mutant) was analyzed using the *TERT* c.1-124C>T in BT328 neurosphere line. **D**, The average absolute output for the DNA concentrations (expected versus observed) is shown for *TERT* c.1-124C>T. **E**, A range of input cell line DNA concentrations (0.1 to 80 copies/ul of reaction, sum of WT and mutant) was analyzed using the *TERT* c.1-146C>T in BT205 neurosphere line. **F**, The average absolute output for the DNA concentrations (expected versus observed) is shown for *TERT* c.1-146C>T.



**Supplementary Table S1 (related to Fig. 1A and 2C).** Cohort 1, clinical characteristics and tumor imaging features.

| Sample ID  | Age | Gender | Tumor location | Tumor area D (mm) x d (mm) | Contrast enhancement | Tumor abutting CSF space | CSF space  | Diagnosis (WHO 2021)                     |
|------------|-----|--------|----------------|----------------------------|----------------------|--------------------------|------------|------------------------------------------|
| CT025      | 81  | F      | T              | 28x16                      | yes                  | no                       | no         | GBM IDH-wt                               |
| CT027      | 68  | F      | FT             | 63x57                      | yes                  | yes                      | ventricles | GBM IDH-wt                               |
| CT046      | 55  | M      | F              | 52x41                      | yes                  | yes                      | ventricles | GBM IDH-wt                               |
| CT047      | 64  | F      | TO             | 31x28                      | yes                  | no                       | no         | GBM IDH-wt                               |
| CT048      | 57  | F      | FT             | 42x35                      | yes                  | no                       | no         | GBM IDH-wt                               |
| CT052      | 66  | F      | insular (T)    | 27x20                      | yes                  | yes                      | ventricles | GBM IDH-wt                               |
| CT053      | 62  | M      | TP             | 40x36                      | yes                  | yes                      | ventricles | GBM IDH-wt                               |
| CT054      | 63  | F      | F              | 3x2                        | yes                  | no                       | no         | GBM IDH-wt                               |
| CT056      | 37  | F      | PO             | 47x32                      | yes                  | no                       | no         | GBM IDH-wt                               |
| CT058      | 72  | M      | T              | 29x20                      | yes                  | yes                      | cisterns   | GBM IDH-wt                               |
| CT059      | 61  | M      | P              | 30x26                      | yes                  | no                       | no         | GBM IDH-wt                               |
| CT062      | 75  | M      | T              | 34x28                      | yes                  | yes                      | ventricles | GBM IDH-wt                               |
| CT063      | 56  | M      | T              | 52x54                      | yes                  | yes                      | cisterns   | GBM IDH-wt                               |
| CT064      | 40  | M      | F              | 33x24                      | yes                  | no                       | no         | GBM IDH-wt                               |
| CT070      | 66  | M      | F              | 27x12                      | yes                  | no                       | no         | GBM IDH-wt                               |
| CT073      | 73  | F      | F              | 17x15                      | yes                  | no                       | no         | GBM IDH-wt                               |
| CT074      | 73  | M      | F              | 46x43                      | yes                  | yes                      | ventricles | GBM IDH-wt                               |
| CT075      | 40  | F      | F              | 14x13                      | yes                  | no                       | no         | grade 3 IDH-mutant oligodendroglioma     |
| CT076      | 68  | F      | T              | 8x7                        | yes                  | no                       | no         | GBM IDH-wt                               |
| CT077      | 74  | M      | F              | 32x30                      | yes                  | no                       | no         | GBM IDH-wt                               |
| CT078      | 63  | M      | insular (T)    | 49x30                      | yes                  | no                       | no         | GBM IDH-wt                               |
| CT079      | 66  | M      | PO             | 40x36                      | yes                  | yes                      | ventricles | GBM IDH-wt                               |
| CT080      | 66  | F      | T              | 50x48                      | yes                  | yes                      | ventricles | GBM IDH-wt                               |
| CT081      | 47  | F      | T              | 34x23                      | yes                  | yes                      | ventricles | GBM IDH-wt                               |
| CT082      | 75  | M      | F              | 45x43                      | yes                  | no                       | no         | GBM IDH-wt                               |
| CT084      | 69  | M      | F              | 18x15                      | yes                  | no                       | no         | GBM IDH-wt                               |
| CT085      | 74  | F      | F              | 60x32                      | yes                  | yes                      | ventricles | GBM IDH-wt                               |
| CT086      | 66  | F      | multicentric   | 34x34                      | yes                  | yes                      | ventricles | GBM IDH-wt                               |
| CT087      | 76  | F      | multicentric   | 53x27                      | yes                  | yes                      | ventricles | GBM IDH-wt                               |
| CT088      | 68  | F      | T              | 41x23                      | yes                  | yes                      | ventricles | GBM IDH-wt                               |
| CT089      | 60  | F      | P              | 50x24                      | yes                  | yes                      | ventricles | GBM IDH-wt                               |
| CT092      | 42  | M      | F              | 24x18                      | yes                  | no                       | no         | GBM IDH-wt                               |
| CT098      | 80  | F      | FT             | 44x43                      | yes                  | no                       | no         | GBM IDH-wt                               |
| CT104      | 50  | M      | FT             | 5x6                        | yes                  | no                       | no         | GBM IDH-wt                               |
| CT115_rec  | 44  | M      | FP             | 32x21                      | yes                  | no                       | no         | recurrent GBM IDH-wt                     |
| CT116      | 76  | M      | F              | 25x15                      | yes                  | no                       | no         | GBM IDH-wt                               |
| CT122      | 68  | M      | insular (F)    | 38x38                      | yes                  | no                       | no         | GBM IDH-wt                               |
| CT124      | 62  | M      | multicentric   | 11x8                       | yes                  | yes                      | ventricles | GBM IDH-wt                               |
| CT132      | 44  | F      | FP             | 25x27                      | yes                  | yes                      | ventricles | grade 1 ganglioglioma                    |
| CT133      | 78  | M      | F              | 31x23                      | yes                  | no                       | no         | GBM IDH-wt                               |
| CT137      | 63  | M      | T              | 34x20                      | yes                  | yes                      | ventricles | GBM IDH-wt                               |
| CT146      | 53  | M      | T              | 40x24                      | yes                  | no                       | no         | GBM IDH-wt                               |
| CT149      | 58  | F      | insular (F)    | 41x36                      | yes                  | no                       | no         | GBM IDH-wt                               |
| CT151      | 67  | M      | TPO            | 44x38                      | yes                  | yes                      | ventricles | GBM IDH-wt                               |
| CTR003_rec | 54  | F      | TP             | 20x15                      | yes                  | no                       | no         | recurrent grade 4 IDH-mutant astrocytoma |

Tumor location: T, temporal; F, frontal; P, parietal; O, occipital.

**Supplementary Table S2 (related to Fig. 1B).** Cohort 1, genetic alterations in tumors (targeted analysis: Sanger sequencing and qPCR).

| Sample ID | Mutation    |             |                      |                                       |                                                                       | CNV         |               |               |             |
|-----------|-------------|-------------|----------------------|---------------------------------------|-----------------------------------------------------------------------|-------------|---------------|---------------|-------------|
|           | <i>IDH1</i> | <i>IDH2</i> | <i>TERT promoter</i> | <i>PTEN</i>                           | <i>TP53</i>                                                           | <i>EGFR</i> | <i>CDKN2A</i> | <i>PDGFRA</i> | <i>CDK4</i> |
| CT025     | wt          | wt          | c.1-124C>T           | wt                                    | wt                                                                    | wt          | del           | amp           | wt          |
| CT027     | wt          | wt          | c.1-124C>T           | del                                   | p.R306*                                                               | wt          | wt            | wt            | amp         |
| CT046     | wt          | wt          | c.1-124C>T           | wt                                    | wt                                                                    | wt          | wt            | wt            | amp         |
| CT047     | wt          | wt          | c.1-124C>T           | p.335*                                | wt                                                                    | wt          | del           | wt            | wt          |
| CT048     | wt          | wt          | wt                   | wt                                    | wt                                                                    | wt          | wt            | wt            | gain        |
| CT052     | wt          | wt          | c.1-124C>T           | p.T319fs*4                            | wt                                                                    | wt          | del           | wt            | wt          |
| CT053     | wt          | wt          | c.1-124C>T           | p.P95delP                             | p.R196P                                                               | gain        | wt            | gain          | amp         |
| CT054     | wt          | wt          | c.1-124C>T           | wt                                    | wt                                                                    | amp         | del           | wt            | wt          |
| CT056     | wt          | wt          | c.1-124C>T           | del                                   | N/A                                                                   | amp         | del           | gain          | wt          |
| CT058     | wt          | wt          | c.1-124C>T           | wt                                    | wt                                                                    | wt          | wt            | wt            | wt          |
| CT059     | wt          | wt          | c.1-124C>T           | p.I32T                                | wt                                                                    | amp         | del           | wt            | wt          |
| CT062     | wt          | wt          | c.1-146C>T           | wt                                    | wt                                                                    | amp         | wt            | wt            | wt          |
| CT063     | wt          | wt          | c.1-124C>T           | wt                                    | c.673-21_677TGGG<br>CCTGTGTTAT<br>CTCCTAGGTT<br>GG>AGGGCC<br>TGTGTTAT | gain        | wt            | wt            | wt          |
| CT064     | wt          | wt          | c.1-124C>T           | p.N329fs*14 +<br>p.K330N +<br>p.K332R | wt                                                                    | amp         | wt            | wt            | amp         |
| CT070     | wt          | wt          | c.1-146C>T           | p. K183fs*15                          | p.H214R                                                               | wt          | del           | amp           | wt          |
| CT073     | wt          | wt          | c.1-124C>T           | wt                                    | wt                                                                    | gain        | wt            | gain          | gain        |
| CT074     | wt          | wt          | c.1-124C>T           | wt                                    | wt                                                                    | gain        | wt            | wt            | wt          |
| CT075     | p.R132H     | wt          | c.1-124C>T           | wt                                    | p.R213R +<br>p.R273C                                                  | wt          | wt            | gain          | amp         |
| CT076     | wt          | wt          | c.1-124C>T           | wt                                    | wt                                                                    | gain        | wt            | gain          | gain        |
| CT077     | wt          | wt          | c.1-124C>T           | del                                   | p.G245C                                                               | gain        | wt            | wt            | amp         |
| CT078     | wt          | wt          | c.1-146C>T           | wt                                    | wt                                                                    | amp         | wt            | wt            | amp         |
| CT079     | wt          | wt          | c.1-124C>T           | p.R130*                               | p.M246R                                                               | wt          | del           | amp           | amp         |
| CT080     | wt          | wt          | c.1-124C>T           | wt                                    | p.R248Q                                                               | wt          | wt            | wt            | amp         |
| CT081     | wt          | wt          | c.1-124C>T           | wt                                    | wt                                                                    | gain        | wt            | wt            | wt          |
| CT082     | wt          | wt          | c.1-124C>T           | wt                                    | wt                                                                    | amp         | del           | amp           | amp         |
| CT084     | wt          | wt          | c.1-124C>T           | del                                   | wt                                                                    | amp         | del           | wt            | wt          |
| CT085     | wt          | wt          | wt                   | p.E43V + p.G208D                      | p.L308Afs*32                                                          | amp         | del           | wt            | gain        |
| CT086     | wt          | wt          | c.1-124C>T           | del                                   | wt                                                                    | amp         | del           | wt            | wt          |
| CT087     | wt          | wt          | c.1-124C>T           | p.S229*                               | wt                                                                    | amp         | del           | wt            | wt          |
| CT088     | wt          | wt          | c.1-146C>T           | del                                   | wt                                                                    | wt          | del           | wt            | wt          |

continued

| Sample ID  | Mutation    |             |                            |             |             | CNV         |               |               |             |
|------------|-------------|-------------|----------------------------|-------------|-------------|-------------|---------------|---------------|-------------|
|            | <i>IDH1</i> | <i>IDH2</i> | <i>TERT promoter</i>       | <i>PTEN</i> | <i>TP53</i> | <i>EGFR</i> | <i>CDKN2A</i> | <i>PDGFRA</i> | <i>CDK4</i> |
| CT089      | wt          | wt          | c.1-124C>T                 | wt          | p. C275Y    | wt          | wt            | wt            | wt          |
| CT092      | wt          | wt          | c.1-124C>T <sup>a</sup>    | wt          | wt          | wt          | wt            | wt            | wt          |
| CT098      | wt          | wt          | c.1-124C>T +<br>c.1-146C>T | wt          | wt          | wt          | wt            | wt            | wt          |
| CT104      | wt          | wt          | wt                         | wt          | wt          | wt          | wt            | wt            | wt          |
| CT115_rec  | wt          | wt          | c.1-124C>T                 | wt          | wt          | wt          | wt            | wt            | wt          |
| CT116      | wt          | wt          | c.1-124C>T                 | wt          | wt          | wt          | wt            | wt            | wt          |
| CT122      | wt          | wt          | c.1-146C>T                 | p.D331fs*13 | wt          | wt          | wt            | gain          | wt          |
| CT124      | wt          | wt          | wt                         | wt          | wt          | wt          | wt            | wt            | gain        |
| CT132      | wt          | wt          | wt                         | wt          | wt          | wt          | wt            | wt            | wt          |
| CT133      | wt          | wt          | c.1-124C>T                 | del         | wt          | amp         | del           | wt            | wt          |
| CT137      | wt          | wt          | c.1-124C>T                 | wt          | wt          | wt          | wt            | wt            | wt          |
| CT146      | wt          | wt          | c.1-146C>T                 | wt          | wt          | amp         | del           | wt            | wt          |
| CT149      | wt          | wt          | wt                         | wt          | p.R282W     | wt          | del           | wt            | wt          |
| CT151      | wt          | wt          | c.1-124C>T                 | wt          | wt          | wt          | del           | wt            | gain        |
| CTR003_rec | p.R132H     | wt          | wt                         | wt          | p.R273C     | wt          | wt            | amp           | wt          |

wt: wild-type; gain: 3<CNV<5; amp: CNV>5; del: CNV<1.5.

<sup>a</sup>: VAF = 0.2%, considered not informative for further analysis in CSF DNA.

**Supplementary Table S3 (related to Fig. 2A-D).** Cohort 1, features of peritumoral CSF and its DNA content.

| Sample ID | Site of sampling | CSF volume (ml) | Blood traces | Total cfDNA amount (ng) | cfDNA concentration (ng/ml) | cfDNA molecular weight (MW) |
|-----------|------------------|-----------------|--------------|-------------------------|-----------------------------|-----------------------------|
| CT025     | subarachn. sp.   | 5.00            | no           | 296.80                  | 59.36                       | H-MW                        |
| CT027     | subarachn. sp.   | 0.35            | no           | 72.80                   | 208.00                      | H-MW                        |
| CT046     | subarachn. sp.   | 0.14            | yes          | 49.56                   | 354.00                      | L-MW                        |
| CT047     | subarachn. sp.   | 0.27            | no           | 70.00                   | 259.26                      | L-MW                        |
| CT048     | subarachn. sp.   | 0.46            | no           | 17.80                   | 38.70                       | n.d.                        |
| CT052     | subarachn. sp.   | 1.97            | yes          | 57.96                   | 29.42                       | n.d.                        |
| CT053     | subarachn. sp.   | 0.85            | yes          | 50.12                   | 58.96                       | n.d.                        |
| CT054     | subarachn. sp.   | 0.62            | no           | 55.44                   | 89.42                       | L-MW                        |
| CT056     | subarachn. sp.   | 0.07            | no           | 14.20                   | 202.86                      | H-MW                        |
| CT058     | subarachn. sp.   | 1.31            | no           | 194.48                  | 148.46                      | MIX-MW                      |
| CT059     | subarachn. sp.   | 0.45            | no           | 47.32                   | 105.16                      | n.d.                        |
| CT062     | subarachn. sp.   | 0.59            | no           | 59.64                   | 101.08                      | H-MW                        |
| CT063     | subarachn. sp.   | 0.10            | no           | 0.00                    | 0.00                        | n.d.                        |
| CT064     | subarachn. sp.   | 0.41            | no           | 13.40                   | 32.68                       | n.d.                        |
| CT070     | subarachn. sp.   | 0.20            | no           | 61.32                   | 306.60                      | n.d.                        |
| CT073     | subarachn. sp.   | 0.75            | no           | 0.00                    | 0.00                        | n.d.                        |
| CT074     | subarachn. sp.   | 0.97            | yes          | 79.52                   | 81.98                       | n.d.                        |
| CT075     | subarachn. sp.   | 0.50            | no           | 38.60                   | 77.20                       | H-MW                        |
| CT076     | subarachn. sp.   | 0.31            | yes          | 135.10                  | 435.81                      | n.d.                        |
| CT077     | subarachn. sp.   | 0.08            | no           | 34.60                   | 411.91                      | MIX-MW                      |
| CT078     | subarachn. sp.   | 0.85            | yes          | 1740.00                 | 2047.06                     | H-MW                        |
| CT079     | subarachn. sp.   | 0.27            | no           | 133.00                  | 492.59                      | MIX-MW                      |
| CT080     | subarachn. sp.   | 0.81            | no           | 12.60                   | 15.56                       | H-MW                        |
| CT081     | subarachn. sp.   | 1.05            | no           | 48.72                   | 46.40                       | L-MW                        |
| CT082     | subarachn. sp.   | 0.45            | no           | 153.00                  | 340.00                      | MIX-MW                      |
| CT084     | subarachn. sp.   | 0.19            | no           | 0.00                    | 0.00                        | n.d.                        |
| CT085     | subarachn. sp.   | 0.53            | yes          | 45.40                   | 85.66                       | H-MW                        |
| CT086     | subarachn. sp.   | 0.75            | yes          | 21.20                   | 28.27                       | H-MW                        |
| CT087     | subarachn. sp.   | 0.25            | yes          | 145.00                  | 580.00                      | MIX-MW                      |
| CT088     | ventricle        | 0.96            | yes          | 5180.00                 | 5395.83                     | H-MW                        |
| CT089     | ventricle        | 1.50            | no           | 19320.00                | 12880.00                    | H-MW                        |
| CT092     | subarachn. sp.   | 1.10            | no           | 36.68                   | 33.35                       | n.d.                        |
| CT098     | subarachn. sp.   | 0.22            | no           | 13.60                   | 61.82                       | H-MW                        |
| CT104     | subarachn. sp.   | 5.24            | no           | 24.00                   | 4.58                        | H-MW                        |
| CT115_rec | subarachn. sp.   | 1.40            | no           | 0.00                    | 0.00                        | L-MW                        |
| CT116     | subarachn. sp.   | 1.68            | no           | 856.00                  | 509.52                      | H-MW                        |
| CT122     | subarachn. sp.   | 2.13            | no           | 21.60                   | 10.14                       | H-MW                        |
| CT124     | subarachn. sp.   | 1.40            | no           | 19.80                   | 14.14                       | H-MW                        |
| CT132     | subarachn. sp.   | 0.80            | no           | 0.00                    | 0.00                        | n.d.                        |

continued

| Sample ID  | Site of sampling | CSF volume (ml) | Blood traces | Total cfDNA amount (ng) | cfDNA concentration (ng/ml) | cfDNA molecular weight (MW) |
|------------|------------------|-----------------|--------------|-------------------------|-----------------------------|-----------------------------|
| CT133      | subarachn. sp.   | 0.25            | no           | 0.00                    | 0.00                        | n.d.                        |
| CT137      | subarachn. sp.   | 1.40            | yes          | 13640.00                | 9742.86                     | MIX-MW                      |
| CT146      | subarachn. sp.   | 0.30            | no           | 0.00                    | 0.00                        | n.d.                        |
| CT149      | subarachn. sp.   | 1.50            | no           | 73.40                   | 48.93                       | MIX-MW                      |
| CT151      | subarachn. sp.   | 4.40            | no           | 104.47                  | 23.74                       | MIX-MW                      |
| CTR003_rec | subarachn. sp.   | 4.90            | no           | 480.00                  | 97.96                       | L-MW                        |

Peritumoral CSFs assessed in targeted NGS are highlighted in blue.

subarachn. sp.: subarachnoid space.

DNA molecular weight: H-MW, high molecular weight; L-MW, low molecular weight; MIX-MW, mixed high and low molecular weight.

n.d.: not detectable for DNA concentration under sensitivity threshold or for poor quality of Bioanalyzer profile.

**Supplementary Table S4 (related to Fig. 2E and F).** Cohort 1, genetic alterations in CSF and tumors (targeted analysis, ddPCR).

| Sample ID | Gene          | cDNA/amino acid variant | Tumor DNA |         | CSF cfDNA |         | Plasma cfDNA |         |
|-----------|---------------|-------------------------|-----------|---------|-----------|---------|--------------|---------|
|           |               |                         | CNV       | VAF (%) | CNV       | VAF (%) | CNV          | VAF (%) |
| CT025     | <i>CDKN2A</i> |                         | 0.76      |         | 0.90      |         |              |         |
| CT027     | <i>TP53</i>   | p.R306*                 |           | 17.00   |           | 31.10   |              |         |
|           | <i>CDK4</i>   |                         | 32.60     |         | 24.40     |         |              |         |
| CT046     | <i>CDK4</i>   |                         | 18.70     |         | 10.00     |         | 2.70         |         |
| CT047     | <i>PTEN</i>   | p.R335*                 |           | 46.45   |           | 41.60   |              | 0.00    |
| CT052     | <i>PTEN</i>   | p.T319fs*1              |           | 41.85   |           | 0.00    |              | 0.00    |
| CT053     | <i>CDK4</i>   |                         | 40.95     |         |           | 4.60    |              | 2.90    |
| CT054     | <i>pTERT</i>  | c.1-124C>T              |           | 23.20   |           | 0.00    |              |         |
|           | <i>CDKN2A</i> |                         | 0.93      |         | no amp    |         | no amp       |         |
|           | <i>EGFR</i>   |                         | 11.91     |         | 2.00      |         | 2.00         |         |
| CT056     | <i>EGFR</i>   |                         | 6.05      |         | 3.90      |         |              |         |
|           | <i>pTERT</i>  | c.1-124C>T              |           | 38.41   |           | 5.16    |              |         |
| CT058     | <i>pTERT</i>  | c.1-124C>T              |           | 11.08   |           | no amp  |              |         |
| CT059     | <i>CDKN2A</i> |                         | 0.44      |         | no amp    |         | no amp       |         |
|           | <i>EGFR</i>   |                         | 44.75     |         | no amp    |         | 1.70         |         |
| CT062     | <i>EGFR</i>   |                         | 6.41      |         | 5.70      |         | 2.20         |         |
| CT063     | <i>pTERT</i>  | c.1-124C>T              |           | 29.50   |           | 0.00    |              | 0.00    |
| CT064     | <i>CDK4</i>   |                         | 10.39     |         | 8.00      |         |              |         |
| CT070     | <i>PDGFRA</i> |                         | 6.71      |         | no amp    |         |              |         |
| CT073     | <i>CDKN2A</i> |                         | 1.55      |         | 1.20      |         |              |         |
| CT074     | <i>pTERT</i>  | c.1-124 C>T             |           | 43.80   |           | 0.00    |              |         |
| CT075     | <i>CDK4</i>   |                         | 27.65     |         | 1.95      |         |              |         |
|           | <i>IDH1</i>   | p.R132H                 |           | 46.20   |           | 0.00    |              |         |
| CT076     | <i>PDGFRA</i> |                         | 2.12      |         | 5.10      |         |              |         |
| CT077     | <i>pTERT</i>  | c.1-124C>T              |           | 37.86   |           | 27.54   |              |         |
| CT078     | <i>CDK4</i>   |                         | 33.50     |         | 11.50     |         |              |         |
| CT079     | <i>PDGFRA</i> |                         | 8.90      |         | 19.90     |         |              |         |
| CT080     | <i>CDK4</i>   |                         | 15.20     |         | 9.10      |         |              |         |
| CT081     | <i>pTERT</i>  | c.1-124C>T              |           | 1.50    |           | 0.00    |              |         |
| CT082     | <i>EGFR</i>   |                         | 25.40     |         | 25.80     |         |              |         |
| CT084     | <i>EGFR</i>   |                         | 71.30     |         | 2.45      |         |              |         |
|           | <i>pTERT</i>  | c.1-124C>T              |           | 31.00   |           | no amp  |              |         |
| CT085     | <i>EGFR</i>   |                         | 33.50     |         | 26.70     |         |              |         |
| CT086     | <i>EGFR</i>   |                         | 51.30     |         | 2.35      |         |              |         |
|           | <i>pTERT</i>  | c.1-124C>T              |           | 38.01   |           | 0.00    |              |         |
| CT087     | <i>EGFR</i>   |                         | 45.30     |         | 43.00     |         |              |         |

continued

| Sample ID  | Gene          | cDNA/amino acid variant | Tumor DNA |         | CSF cfDNA |         | Plasma cfDNA |         |
|------------|---------------|-------------------------|-----------|---------|-----------|---------|--------------|---------|
|            |               |                         | CNV       | VAF (%) | CNV       | VAF (%) | CNV          | VAF (%) |
| CT088      | <i>CDKN2A</i> |                         | 1.60      |         | 2.04      |         |              |         |
|            | <i>pTERT</i>  | c.1-146C>T              |           | 10.35   |           | 7.36    |              |         |
| CT089      | <i>TP53</i>   | p.C275Y                 |           | 39.50   |           | 83.80   |              |         |
| CT098      | <i>pTERT</i>  | c.1-124C>T              |           | 1.50    |           | 0.00    |              |         |
| CT115_rec  | <i>pTERT</i>  | c.1-124C>T              |           | 0.27    |           | 8.50    |              |         |
| CT116      | <i>pTERT</i>  | c.1-124C>T              |           | 14.90   |           | 12.10   |              |         |
| CT122      | <i>pTERT</i>  | c.1-146C>T              |           | 15.00   |           | 0.00    |              |         |
| CT133      | <i>EGFR</i>   |                         | 27.50     |         | no amp    |         |              |         |
|            | <i>pTERT</i>  | c.1-124C>T              |           | 12.48   |           | no amp  |              |         |
| CT137      | <i>pTERT</i>  | c.1-124C>T              |           | 22.57   |           | 12.09   |              |         |
| CT146      | <i>EGFR</i>   |                         | 32.60     |         | 15.80     |         |              |         |
|            | <i>pTERT</i>  | c.1-146C>T              |           | 30.48   |           | 4.40    |              |         |
| CT149      | <i>CDKN2A</i> |                         | 1.35      |         | 2.05      |         |              |         |
|            | <i>TP53</i>   | p.R282W                 |           | 24.00   |           | 0.00    |              |         |
| CT151      | <i>pTERT</i>  | c.1-124C>T              |           | 2.50    |           | 6.60    |              |         |
| CTR003_rec | <i>IDH1</i>   | p.R132H                 |           | 15.10   |           | 41.10   |              |         |

no amp: ddPCR failure.

**Supplementary Table S5 (related to Fig. 2I).** Cohort 1, NGS analysis of tumors and CSFs.

| Sample ID  |                       | SNV <sup>a</sup> |                |                    |         | CNV <sup>b</sup> |          |       |
|------------|-----------------------|------------------|----------------|--------------------|---------|------------------|----------|-------|
|            |                       | Gene ID          | cDNA Variant   | Amino Acid Variant | VAF (%) | Gene ID          | Amp/Del  | CN    |
| CT087      | tumor DNA             | <i>PTEN</i>      | c.686C>A       | p.S229*            | 25.00   | <i>EGFR</i>      | amp      | 41.00 |
|            |                       | <i>ASCL1</i>     | c.114_128del   | p.A43_A47del       | 18.99   |                  |          |       |
|            | peritumoral CSF cfDNA | <i>PTEN</i>      | c.686C>A       | p.S229*            | 32.00   | <i>EGFR</i>      | amp      | 32.50 |
|            |                       | <i>ASCL1</i>     | c.114_128del   | p.A43_A47del       | 17.86   |                  |          |       |
| CT116      | tumor DNA             | <i>RB1</i>       | c.1703dup      | p.L569Ffs*3        | 9.23    |                  |          |       |
|            |                       | <i>TP53</i>      | c.814G>A       | p.V272M            | 5.90    |                  |          |       |
|            |                       | <i>TP53</i>      | c.796G>A       | p.G266R            | 10.01   |                  |          |       |
|            |                       | <i>PIK3R1</i>    | c.1392_1403dup | p.D464_Y467dup     | 0.00    |                  |          |       |
|            | peritumoral CSF cfDNA | <i>RB1</i>       | c.1703dup      | p.L569Ffs*3        | 19.67   |                  |          |       |
|            |                       | <i>TP53</i>      | c.814G>A       | p.V272M            | 12.15   |                  |          |       |
|            |                       | <i>TP53</i>      | c.796G>A       | p.G266R            | 21.65   |                  |          |       |
|            |                       | <i>PIK3R1</i>    | c.1392_1403dup | p.D464_Y467dup     | 11.07   |                  |          |       |
| CTR003_rec | tumor DNA             | <i>PTEN</i>      | c.388C>G       | p.R130G            | 3.97    | <i>AKT1</i>      | gain/amp | 5.00  |
|            |                       | <i>IDH1</i>      | c.395G>A       | p.R132H            | 14.70   | <i>PDGFRA</i>    | amp      | 14.80 |
|            |                       | <i>ATRX</i>      | c.865C>T       | p.Q289*            | 12.90   |                  |          |       |
|            |                       | <i>TP53</i>      | c.817C>T       | p.R273C            | 20.70   |                  |          |       |
|            |                       | <i>MSH6</i>      | c.1372C>T      | p.H458Y            | 5.14    |                  |          |       |
|            | peritumoral CSF cfDNA | <i>PTEN</i>      | c.388C>G       | p.R130G            | 52.90   | <i>AKT1</i>      | amp      | 22.20 |
|            |                       | <i>IDH1</i>      | c.395G>A       | p.R132H            | 38.77   | <i>PDGFRA</i>    | amp      | 42.20 |
|            |                       | <i>ATRX</i>      | c.865C>T       | p.Q289*            | 39.03   |                  |          |       |
|            |                       | <i>TP53</i>      | c.817C>T       | p.R273C            | 72.80   |                  |          |       |
|            |                       | <i>MSH6</i>      | c.1372C>T      | p.H458Y            | 48.60   |                  |          |       |

SNV: single nucleotide variant; CNV: copy number variation; VAF: variant allele frequency; CN: copy number.

<sup>a</sup>: variants predicted to be pathogenic based on MutationTaster (<https://www.genecascade.org/MutationTaster2021/>), COSMIC (<https://cancer.sanger.ac.uk/cosmic>) and IARC (<https://tp53.isb-cgc.org/>) databases.

<sup>b</sup>: CNV predicted to be pathogenic based on OncoKB™ (<http://www.oncokb.org/>).

Complete NGS analysis is reported in Supplementary Data 1.



**Supplementary Table S6 (related to Fig. 3A).** Cohort 2, clinical characteristics.

| Sample ID           | Age | Gender | Diagnosis (WHO 2021)                            | Recurrent |
|---------------------|-----|--------|-------------------------------------------------|-----------|
| MG1926              | 54  | F      | GBM IDH-wt                                      | no        |
| MG1927_rec          | 48  | M      | grade 4 IDH-mutant astrocytoma                  | yes       |
| MG1928              | 51  | M      | grade 3 IDH-mutant astrocytoma                  | no        |
| MG1938              | 74  | F      | GBM IDH-wt                                      | no        |
| MG1942_rec          | 47  | F      | GBM IDH-wt                                      | yes       |
| MG1943              | 32  | F      | grade 3 IDH-mutant astrocytoma                  | no        |
| MG1944              | 63  | F      | GBM IDH-wt                                      | no        |
| MG1945              | 50  | F      | GBM IDH-wt                                      | no        |
| MG2046 <sup>a</sup> | 73  | M      | GBM IDH-wt                                      | no        |
| MG2047              | 68  | M      | GBM IDH-wt                                      | no        |
| MG2048              | 69  | M      | GBM IDH-wt                                      | no        |
| MG2049              | 72  | M      | GBM IDH-wt                                      | no        |
| MG2049_rec          | 72  | M      | GBM IDH-wt                                      | yes       |
| MG2050              | 21  | M      | GBM IDH-wt                                      | no        |
| MG2051              | 46  | M      | GBM IDH-wt                                      | no        |
| MG2052              | 80  | M      | GBM IDH-wt                                      | no        |
| MG2053              | 53  | M      | GBM IDH-wt                                      | no        |
| MG2054              | 47  | M      | GBM IDH-wt                                      | no        |
| MG2055_rec          | 55  | M      | GBM IDH-wt                                      | yes       |
| MG2056              | 33  | M      | GBM IDH-wt                                      | no        |
| MG2057              | 58  | M      | GBM IDH-wt                                      | no        |
| MG2058_rec          | 50  | F      | GBM IDH-wt                                      | yes       |
| MG2059              | 64  | F      | GBM IDH-wt                                      | no        |
| MG2060              | 74  | F      | GBM IDH-wt                                      | no        |
| MG2061              | 67  | F      | GBM IDH-wt                                      | no        |
| MG2062_rec          | 48  | M      | GBM IDH-wt                                      | yes       |
| MG2063              | 67  | F      | GBM IDH-wt                                      | no        |
| MG2064              | 43  | M      | grade 4 IDH2-mutant astrocytoma                 | no        |
| MG2065              | 78  | M      | GBM IDH-wt                                      | no        |
| MG2166              | 39  | F      | GBM IDH-wt                                      | no        |
| MG2167              | 61  | F      | grade 3 supratentorial ependymoma               | no        |
| MG2168              | 48  | F      | grade 2 IDH-mutant co-deleted oligodendroglioma | no        |
| MG2169              | 78  | M      | GBM IDH-wt                                      | no        |
| MG2170              | 81  | F      | GBM IDH-wt                                      | no        |
| MG2171              | 55  | F      | GBM IDH-wt                                      | no        |
| MG2172              | 71  | F      | GBM IDH-wt                                      | no        |
| MG2173              | 57  | M      | grade 3 IDH-mutant co-deleted oligodendroglioma | no        |
| MG2174              | 50  | F      | grade 1 ganglioglioma                           | no        |
| MG2177              | 74  | M      | GBM IDH-wt                                      | no        |
| MG2179              | 75  | M      | GBM IDH-wt                                      | no        |

<sup>a</sup>: patient with LP-CSF collected 2 months after surgery.

**Supplementary Table S7 (related to Fig. 3B).** Cohort 2, genetic alterations in tumors (targeted analysis: sequencing and FISH).

|                           | <i>IDH1</i> | <i>IDH2</i> | <i>pTERT</i>      | <i>EGFR</i> |
|---------------------------|-------------|-------------|-------------------|-------------|
| <b>MG1926</b>             | wt          | n.a.        | c.1-124C>T        | amp         |
| <b>MG1927_rec</b>         | p.R132H     | n.a.        | wt                | wt          |
| <b>MG1928</b>             | p.R132H     | n.a.        | wt                | wt          |
| <b>MG1938</b>             | wt          | n.a.        | c.1-124C>T        | amp         |
| <b>MG1942_rec</b>         | wt          | n.a.        | c.1-124C>T        | wt          |
| <b>MG1943</b>             | p.R132H     | n.a.        | wt                | wt          |
| <b>MG1944</b>             | wt          | n.a.        | c.1-124C>T        | n.a.        |
| <b>MG1945</b>             | wt          | n.a.        | c.1-124C>T        | neg         |
| <b>MG2046<sup>a</sup></b> | wt          | n.a.        | c.1-124C>T        | wt          |
| <b>MG2047</b>             | wt          | n.a.        | c.1-124C>T        | amp         |
| <b>MG2048</b>             | wt          | n.a.        | c.1-124C>T        | wt          |
| <b>MG2049</b>             | wt          | n.a.        | c.1-124C>T        | amp         |
| <b>MG2049_rec</b>         | wt          | n.a.        | c.1-124C>T        | amp         |
| <b>MG2050</b>             | wt          | wt          | c.1-146C>T        | amp         |
| <b>MG2051</b>             | wt          | wt          | wt                | n.a.        |
| <b>MG2052</b>             | wt          | n.a.        | c.1-124C>T        | wt          |
| <b>MG2053</b>             | wt          | wt          | c.1-124C>T        | amp         |
| <b>MG2054</b>             | wt          | wt          | c.1-146C>T        | amp         |
| <b>MG2055_rec</b>         | wt          | n.a.        | c.1-124C>T        | amp         |
| <b>MG2056</b>             | wt          | wt          | wt                | n.a.        |
| <b>MG2057</b>             | wt          | n.a.        | wt                | n.a.        |
| <b>MG2058_rec</b>         | wt          | wt          | c.1-124C>T        | amp         |
| <b>MG2059</b>             | wt          | n.a.        | c.1-124C>T        | amp         |
| <b>MG2060</b>             | wt          | n.a.        | c.1-146C>T        | amp         |
| <b>MG2061</b>             | wt          | n.a.        | c.1-124C>T        | amp         |
| <b>MG2062_rec</b>         | wt          | n.a.        | wt                | wt          |
| <b>MG2063</b>             | wt          | n.a.        | c.1-124C>T        | wt          |
| <b>MG2064</b>             | wt          | p.R172K     | wt                | amp         |
| <b>MG2065</b>             | wt          | n.a.        | c.1-124C>T        | wt          |
| <b>MG2166</b>             | wt          | n.a.        | c.1-146G>A        | wt          |
| <b>MG2167</b>             | wt          | wt          | -124G>T e -149G>A | wt          |
| <b>MG2168</b>             | p.R132H     | n.a.        | wt                | wt          |
| <b>MG2169</b>             | wt          | n.a.        | c.1-124C>T        | wt          |
| <b>MG2170</b>             | wt          | n.a.        | c.1-124C>T        | wt          |
| <b>MG2171</b>             | wt          | n.a.        | c.1-124C>T        | amp         |
| <b>MG2172</b>             | wt          | n.a.        | c.1-146C>T        | wt          |
| <b>MG2173</b>             | p.R132H     | n.a.        | c.1-124C>T        | wt          |
| <b>MG2174</b>             | wt          | n.a.        | wt                | wt          |
| <b>MG2177</b>             | wt          | n.a.        | c.1-124C>T        | amp         |
| <b>MG2179</b>             | wt          | n.a.        | c.1-124C>T        | wt          |

wt: wild-type; amp: amplification.

n.a.: not assessed.

<sup>a</sup>: patient with LP-CSF collected 2 months after surgery.

**Supplementary Table S8 (related to Fig. 3C-E).** Cohort 2, features of CSF obtained by lumbar puncture (LP-CSF) and its DNA content.

| Sample ID             | Blood traces |        | LP-CSF volume (ml) | Total DNA amount (ng) |                           | DNA concentration (ng/ml) |                           | DNA molecular weight (MW) |                           |
|-----------------------|--------------|--------|--------------------|-----------------------|---------------------------|---------------------------|---------------------------|---------------------------|---------------------------|
|                       | Supernatant  | Pellet |                    | cfDNA <sup>a</sup>    | cellular DNA <sup>b</sup> | cfDNA <sup>a</sup>        | cellular DNA <sup>b</sup> | cfDNA <sup>a</sup>        | cellular DNA <sup>b</sup> |
| MG1926                | no           | no     | 5.00               | 0.10                  | .                         | 0.02                      | .                         | .                         | .                         |
| MG1927_rec            | no           | no     | 9.00               | 1224.00               | .                         | 136.00                    | .                         | MIX-MW                    | .                         |
| MG1928                | no           | no     | 3.00               | 0.10                  | .                         | 0.03                      | .                         | .                         | .                         |
| MG1938                | no           | no     | 3.00               | 0.10                  | 0.00                      | 0.03                      | 0.00                      | .                         | n.d.                      |
| MG1942_rec            | no           | no     | 12.00              | 36.18                 | 0.00                      | 3.02                      | 0.00                      | MIX-MW                    | n.d.                      |
| MG1943                | no           | no     | 3.00               | 0.10                  | 0.00                      | 0.03                      | 0.00                      | .                         | n.d.                      |
| MG1944                | no           | no     | .                  | 0.10                  | 0.00                      | 0.00                      | 0.00                      | .                         | n.d.                      |
| MG1945                | no           | no     | 1.50               | 0.10                  | 0.00                      | 0.07                      | 0.00                      | .                         | n.d.                      |
| MG2046 <sup>c,d</sup> | no           | no     | 5.00               | 0.10                  | 140.00                    | 0.02                      | 28.00                     | .                         | H-MW                      |
| MG2047                | no           | no     | 3.00               | 0.10                  | 25.92                     | 0.03                      | 8.64                      | .                         | H-MW                      |
| MG2048                | no           | no     | 0.30               | 0.10                  | 8.75                      | 0.33                      | 29.17                     | .                         | n.d.                      |
| MG2049                | no           | no     | 10.00              | 0.10                  | 9.96                      | 0.01                      | 0.99                      | .                         | n.d.                      |
| MG2049_rec            | no           | no     | 4.00               | 4.65                  | 12.84                     | 1.16                      | 3.21                      | n.d.                      | H-MW                      |
| MG2050                | no           | no     | 5.00               | 0.10                  | 11.16                     | 0.02                      | 2.23                      | .                         | H-MW                      |
| MG2051                | no           | no     | 5.00               | 0.10                  | 0.00                      | 0.02                      | 0.00                      | L-MW                      | n.d.                      |
| MG2052                | no           | no     | 5.00               | 0.10                  | 26.16                     | 0.02                      | 5.23                      | .                         | H-MW                      |
| MG2053                | no           | no     | 3.00               | 0.10                  | 30.36                     | 0.03                      | 10.12                     | L-MW                      | H-MW                      |
| MG2054                | no           | no     | 2.00               | 0.10                  | 76.80                     | 0.05                      | 38.40                     | .                         | H-MW                      |
| MG2055_rec            | no           | no     | 2.50               | 0.10                  | 10.20                     | 0.04                      | 4.08                      | .                         | n.d.                      |
| MG2056 <sup>c</sup>   | no           | no     | 1.50               | 12.96                 | 851.50                    | 8.64                      | 567.67                    | L-MW                      | H-MW                      |
| MG2057                | no           | no     | 5.00               | 0.10                  | 0.00                      | 0.02                      | 0.00                      | .                         | n.d.                      |
| MG2058_rec            | no           | no     | 3.00               | 0.10                  | 17.52                     | 0.03                      | 5.84                      | .                         | H-MW                      |
| MG2059                | no           | no     | 3.00               | 0.10                  | 1.56                      | 0.03                      | 0.52                      | n.d.                      | n.d.                      |
| MG2060                | no           | yes    | 3.00               | 0.10                  | 6.99                      | 0.03                      | 2.33                      | n.d.                      | H-MW                      |
| MG2061                | no           | no     | 2.50               | 0.10                  | 0.00                      | 0.04                      | 0.00                      | n.d.                      | n.d.                      |
| MG2062_rec            | no           | yes    | 3.50               | 1.59                  | 23.85                     | 0.46                      | 6.81                      | n.d.                      | H-MW                      |
| MG2063                | no           | no     | 5.50               | 81.20                 | 108.30                    | 14.76                     | 19.69                     | L-MW                      | H-MW                      |
| MG2064                | no           | no     | 5.00               | 5.82                  | 1.56                      | 1.16                      | 0.31                      | n.d.                      | n.d.                      |
| MG2065                | no           | yes    | 3.00               | 4.86                  | 7.50                      | 1.62                      | 2.50                      | n.d.                      | H-MW                      |
| MG2166                | no           | yes    | 4.00               | 4.80                  | 63.30                     | 1.20                      | 15.83                     | n.d.                      | H-MW                      |
| MG2168                | no           | no     | 2.50               | 0.10                  | 5.07                      | 0.04                      | 2.03                      | n.d.                      | n.d.                      |
| MG2169                | no           | no     | 4.00               | 5.37                  | 4.62                      | 1.34                      | 1.15                      | n.d.                      | H-MW                      |
| MG2170                | no           | yes    | 5.00               | 30.90                 | 10.23                     | 6.18                      | 2.05                      | L-MW                      | H-MW                      |
| MG2171                | no           | yes    | 3.00               | 8.16                  | 8.91                      | 2.72                      | 2.97                      | H-MW                      | n.d.                      |
| MG2172                | no           | no     | 3.00               | 3.27                  | 2.34                      | 1.09                      | 0.78                      | n.d.                      | n.d.                      |
| MG2173                | no           | no     | 2.00               | 0.10                  | 0.00                      | 0.05                      | 0.00                      | n.d.                      | n.d.                      |
| MG2177                | no           | yes    | 3.50               | 3.78                  | 7.50                      | 1.08                      | 2.14                      | n.d.                      | n.d.                      |
| MG2179                | no           | no     | 1.80               | 0.10                  | 3.09                      | 0.06                      | 1.72                      | n.d.                      | n.d.                      |

DNAs from LP-CSFs assessed in targeted NGS and corresponding patients are highlighted in blue.

DNAs from LP-CSFs not assessed in NGS despite quantity > 10 ng are highlighted in grey.

DNA molecular weight: H-MW, high molecular weight; L-MW, low molecular weight; MIX-MW, mixed high and low molecular weight.

n.d.: not detectable.

<sup>a</sup>: cfDNA extracted from LP-CSF supernatant.

<sup>b</sup>: cellular DNA extracted from LP-CSF pellet.

<sup>c</sup>: cfDNA not assessed in NGS despite quantity > 10 ng as corresponding tumor tissue was exhausted.

<sup>d</sup>: patient with LP-CSF collected 2 months after surgery.

**Supplementary Table S9 (related to Fig. 3E).** Cohort 2, tumor imaging features.

| Sample ID  | Tumor location | Tumor area D (mm) x d (mm) | Contrast enhancement | Tumor abutting CSF space | CSF space  |
|------------|----------------|----------------------------|----------------------|--------------------------|------------|
| MG1926     | F left         | 8x8                        | yes                  | no                       |            |
| MG1927_rec | F left         | 63x35                      | yes                  | yes                      | ventricles |
| MG1928     | F right        | 30x22                      | yes                  | no                       |            |
| MG1938     | TO left        | 33x18                      | yes                  | yes                      | ventricles |
| MG1942_rec | F right        | 30x30                      | yes                  | yes                      | ventricles |
| MG1943     | TP right       | 38x29                      | no                   | no                       |            |
| MG1944     | FI right       | 42x40                      | yes                  | no                       |            |
| MG1945     | F right        | 35x27                      | yes                  | yes                      | cisterns   |
| MG2046     | TO left        | 47x28                      | yes                  | yes                      | ventricles |
| MG2047     | P left         | 27x25                      | yes                  | no                       |            |
| MG2048     | PO left        | 30x29                      | yes                  | yes                      | ventricles |
| MG2049     | F left         | 56x43                      | yes                  | yes                      | ventricles |
| MG2049_rec | F left         | 49x32                      | yes                  | no                       |            |
| MG2050     | FT left        | 65x56                      | yes                  | yes                      | ventricles |
| MG2051     | FT left        | 55x26                      | yes                  | no                       |            |
| MG2052     | T right        | 46x33                      | yes                  | no                       |            |
| MG2053     | F left         | N/A                        | yes                  | no                       |            |
| MG2054     | T right        | 67x38                      | yes                  | yes                      | ventricles |
| MG2055_rec | T right        | 67x45                      | yes                  | yes                      | cisterns   |
| MG2056     | F right        | 84x18                      | yes                  | yes                      | ventricles |
| MG2057     | P left         | 39x38                      | yes                  | yes                      | ventricles |
| MG2058_rec | F right        | 48x20                      | yes                  | no                       |            |
| MG2059     | T right        | 24x12                      | yes                  | yes                      | ventricles |
| MG2060     | T right        | 36x28                      | yes                  | no                       |            |
| MG2061     | P left         | 55x48                      | yes                  | yes                      | ventricles |
| MG2062_rec | PO right       | 37x34                      | yes                  | yes                      | ventricles |
| MG2063     | T left         | 49x16                      | yes                  | yes                      | cisterns   |
| MG2064     | P right        | 44x27                      | yes                  | no                       |            |
| MG2065     | O left         | 32x24                      | yes                  | no                       |            |
| MG2166     | FI left        | 67x43                      | no                   | yes                      | cisterns   |
| MG2168     | TI left        | 67x22                      | no                   | no                       |            |
| MG2169     | PO left        | 56x37                      | yes                  | yes                      | ventricles |
| MG2170     | T right        | 57x38                      | yes                  | yes                      | ventricles |
| MG2171     | P left         | 10x9                       | yes                  | no                       |            |
| MG2172     | PO left        | 42x24                      | yes                  | yes                      | ventricles |
| MG2173     | F right        | 27x23                      | no                   | no                       |            |
| MG2177     | F left         | 38x30                      | yes                  | no                       |            |
| MG2179     | T left         | 36x22                      | yes                  | no                       |            |

Tumor location: F, frontal; T, temporal; P, parietal; I, insular; O, occipital.  
N/A: not available.

**Supplementary Table S10 (related to Fig. 3G and Supplementary Fig. S3).** Cohort 2, NGS analysis of tumors and LP-CSFs.

| Sample ID  |                  | SNV <sup>a</sup> |              |                    |               | CNV <sup>b</sup> |          |       |
|------------|------------------|------------------|--------------|--------------------|---------------|------------------|----------|-------|
|            |                  | Gene             | cDNA Variant | Amino Acid Variant | VAF (%)       | Gene             | Amp/Del  | CN    |
| MG2063     | Tumor DNA        | <i>POLD1_a</i>   | c.G2455T     | p.D819Y            | 11.80         | <i>CDKN2A</i>    | del      | 0.36  |
|            |                  | <i>CIC_a</i>     | c.C2641T     | p.Q881*            | 10.25         | <i>CDKN2B</i>    | del      | 0.44  |
|            |                  |                  |              |                    |               | <i>PTEN</i>      | del      | 0.60  |
|            |                  |                  |              |                    |               | <i>MLH3</i>      |          | 1.41  |
|            |                  |                  |              |                    |               | <i>CIC_b</i>     | del      | 0.87  |
|            |                  |                  |              |                    |               | <i>POLD1_b</i>   | del      | 0.94  |
|            | CSF cfDNA        | <i>POLD1_a</i>   | c.G2455T     | p.D819Y            | 0.00          | <i>CDKN2A</i>    | del      | 0.89  |
|            |                  | <i>CIC_a</i>     | c.C2641T     | p.Q881*            | 0.00          | <i>CDKN2B</i>    | del      | 0.72  |
|            |                  |                  |              |                    |               | <i>PTEN</i>      | del      | 0.46  |
|            |                  |                  |              |                    |               | <i>MLH3</i>      | del      | 0.95  |
|            |                  |                  |              |                    |               | <i>CIC_b</i>     | del      | 0.89  |
|            |                  |                  |              |                    |               | <i>POLD1_b</i>   |          | 1.69  |
|            | CSF cellular DNA | <i>POLD1_a</i>   | c.G2455T     | p.D819Y            | 0.00          | <i>CDKN2A</i>    |          | 1.50  |
|            |                  | <i>CIC_a</i>     | c.C2641T     | p.Q881*            | 0.00          | <i>CDKN2B</i>    |          | 1.56  |
|            |                  |                  |              |                    |               | <i>PTEN</i>      |          | 2.00  |
|            |                  |                  |              |                    |               | <i>MLH3</i>      |          | 1.89  |
|            |                  |                  |              |                    |               | <i>CIC</i>       |          | 1.83  |
|            |                  |                  |              |                    |               | <i>POLD1</i>     |          | 1.78  |
| MG1927_rec | Tumor DNA        | <i>IDH1</i>      | c.G395A      | p.R132H            | 44.00         | <i>CDK6</i>      | amp      | 43.40 |
|            |                  | <i>TP53_a</i>    | c.T1022G     | p.F341C            | 48.00         | <i>PDGFRA</i>    | amp      | 15.75 |
|            |                  | <i>TP53_b</i>    | c.T590G      | p.V197G            | 45.00         | <i>MYC</i>       | amp      | 19.90 |
|            |                  |                  |              |                    |               | <i>MLH3</i>      | del      | 1.11  |
|            |                  |                  |              |                    |               | <i>PMS2</i>      | del      | 1.33  |
|            |                  |                  |              |                    |               | <i>ATRX</i>      |          | 1.45  |
|            | CSF cfDNA        | <i>IDH1</i>      | c.G395A      | p.R132H            | 47.70         | <i>CDK6</i>      | amp      | 58.90 |
|            |                  | <i>TP53_a</i>    | c.T1022G     | p.F341C            | 40.30         | <i>PDGFRA</i>    | amp      | 17.17 |
|            |                  | <i>TP53_b</i>    | c.T590G      | p.V197G            | 49.30         | <i>MYC</i>       | gain/amp | 5.33  |
|            |                  |                  |              |                    |               | <i>MLH3</i>      | del      | 0.78  |
|            |                  |                  |              |                    |               | <i>PMS2</i>      | del      | 0.80  |
|            |                  |                  |              |                    |               | <i>ATRX</i>      | del      | 1.01  |
|            |                  |                  |              |                    | <i>CDKN2A</i> |                  | 1.65     |       |
|            |                  |                  |              |                    | <i>CDKN2B</i> |                  | 1.97     |       |

continued

| Sample ID               |                  | SNV <sup>a</sup>        |                |                    |             | CNV <sup>b</sup> |         |       |
|-------------------------|------------------|-------------------------|----------------|--------------------|-------------|------------------|---------|-------|
|                         |                  | Gene                    | cDNA Variant   | Amino Acid Variant | VAF (%)     | Gene             | Amp/Del | CN    |
| MG1942_rec              | tumor DNA        | <i>NOTCH1</i>           | c.T1526A       | p.I509N            | 63.57       |                  |         |       |
|                         |                  | <i>PTEN</i>             | c.A536T        | p.K179I            | 33.56       |                  |         |       |
|                         |                  | <i>MLH1</i>             | c.C2250A       | p.Y750*            | 20.90       |                  |         |       |
|                         |                  | <i>NF1_a</i>            | c.G5108A       | p.S1703N           | 17.29       |                  |         |       |
|                         |                  | <i>NF1_b</i>            | c.C808T        | p.Q270*            | 14.28       |                  |         |       |
|                         |                  | <i>TP53</i>             | c.C847A        | p.R283S            | 17.24       |                  |         |       |
|                         |                  | <i>PIK3R1_a</i>         | c.T1063C       | p.F355L            | 14.86       |                  |         |       |
|                         |                  | <i>PIK3R1_b</i>         | c.697_711del   | p.P233_W237del     | 0.00        |                  |         |       |
|                         |                  | <i>POLD1</i>            | c.C1188A       | p.Y396*            | 12.00       |                  |         |       |
|                         |                  | <i>IDH2<sup>c</sup></i> | c.G355A        | p.D119N            | 11.76       |                  |         |       |
|                         | <i>MET</i>       | c.C1067A                | p.P356Q        | 11.11              |             |                  |         |       |
|                         | <i>FGFR1</i>     | c.G2303T                | p.W768L        | 10.59              |             |                  |         |       |
|                         | <i>PMS2</i>      | c.A89C                  | p.Q30p         | 10.23              |             |                  |         |       |
|                         | CSF cfDNA        | <i>NOTCH1</i>           | c.T1526A       | p.I509N            | 51.16       |                  |         |       |
|                         |                  | <i>PTEN</i>             | c.A536T        | p.K179I            | 0.00        |                  |         |       |
|                         |                  | <i>MLH1</i>             | c.C2250A       | p.Y750*            | 0.00        |                  |         |       |
|                         |                  | <i>NF1_a</i>            | c.G5108A       | p.S1703N           | 0.00        |                  |         |       |
|                         |                  | <i>NF1_b</i>            | c.C808T        | p.Q270*            | 0.00        |                  |         |       |
|                         |                  | <i>TP53</i>             | c.C847A        | p.R283S            | 0.00        |                  |         |       |
|                         |                  | <i>PIK3R1_a</i>         | c.T1063C       | p.F355L            | 0.00        |                  |         |       |
| <i>PIK3R1_b</i>         |                  | c.697_711del            | p.P233_W237del | 12.66              |             |                  |         |       |
| <i>POLD1</i>            |                  | c.C1188A                | p.Y396*        | 0.00               |             |                  |         |       |
| <i>IDH2<sup>c</sup></i> |                  | c.G355A                 | p.D119N        | 0.00               |             |                  |         |       |
| <i>MET</i>              | c.C1067A         | p.P356Q                 | 0.00           |                    |             |                  |         |       |
| <i>FGFR1</i>            | c.G2303T         | p.W768L                 | 0.00           |                    |             |                  |         |       |
| <i>PMS2</i>             | c.A89C           | p.Q30p                  | 0.00           |                    |             |                  |         |       |
| MG2170                  | tumor DNA        | <i>TP53_a</i>           | c.G818A        | p.R273H            | 31.50       | <i>CDKN2A</i>    | del     | 0.57  |
|                         |                  | <i>TP53_b</i>           | c.C817T        | p.R273C            | 30.00       | <i>CDKN2B</i>    | del     | 0.47  |
|                         |                  | <i>TP53_c</i>           | c.G845A        | p.R282Q            | 0.00        | <i>MYCN</i>      |         | 2.08  |
|                         |                  | <i>TP53_d</i>           | c.A740T        | p.N247I            | 0.00        | <i>PTEN</i>      | del     | 0.68  |
|                         |                  | <i>TP53_e</i>           | c.A701G        | p.Y234C            | 0.00        | <i>RB1</i>       | del     | 1.16  |
|                         | <i>PIK3CA</i>    | c.A1G                   | p.M1V          | 33.90              | <i>MLH3</i> | del              | 1.17    |       |
|                         | CSF cfDNA        | <i>TP53_a</i>           | c.G818A        | p.R273H            | 2.00        | <i>CDKN2A</i>    |         | 2.17  |
|                         |                  | <i>TP53_b</i>           | c.C817T        | p.R273C            | 0.00        | <i>CDKN2B</i>    |         | 1.65  |
|                         |                  | <i>TP53_c</i>           | c.G845A        | p.R282Q            | 30.70       | <i>MYCN</i>      | amp     | 62.11 |
|                         |                  | <i>TP53_d</i>           | c.A740T        | p.N247I            | 40.70       | <i>PTEN</i>      | del     | 1.09  |
| <i>TP53_e</i>           |                  | c.A701G                 | p.Y234C        | 17.60              | <i>RB1</i>  | del              | 1.04    |       |
| <i>PIK3CA</i>           | c.A1G            | p.M1V                   | 0.00           | <i>MLH3</i>        | del         | 1.36             |         |       |
| MG2166                  | tumor DNA        | <i>PTEN</i>             | c.C517T        | p.R173C            | 51.70       | <i>EGFR</i>      | amp     | 13.60 |
|                         |                  | <i>EGFR</i>             | c.C866A        | p.A289D            | 92.40       | <i>CDKN2A</i>    | del     | 0.50  |
|                         |                  |                         |                |                    |             | <i>CDKN2B</i>    | del     | 0.46  |
|                         |                  |                         |                |                    |             | <i>PMS2</i>      | del     | 1.15  |
|                         | CSF cellular DNA |                         |                |                    |             | <i>HIST1H3B</i>  | del     | 1.12  |
|                         |                  | <i>PTEN</i>             | c.C517T        | p.R173C            | 0.00        | <i>EGFR</i>      |         | 2.40  |
|                         |                  | <i>EGFR</i>             | c.C866A        | p.A289D            | 0.00        | <i>CDKN2A</i>    |         | 1.40  |
|                         |                  |                         |                |                    |             | <i>CDKN2B</i>    |         | 1.36  |
|                         |                  |                         |                |                    |             | <i>PMS2</i>      |         | 1.52  |
|                         |                  |                         |                |                    |             | <i>HIST1H3B</i>  |         | 1.45  |
| MG2062_rec              | tumor DNA        | <i>NF1</i>              | c.7229_7232del | p.V2410Efs*7       | 15.10       | <i>HIST1H3B</i>  |         | 3.30  |
|                         |                  |                         |                |                    |             | <i>ATRX</i>      | del     | 1.10  |
|                         | CSF cellular DNA | <i>NF1</i>              | c.7229_7232del | p.V2410Efs*7       | 0.00        | <i>HIST1H3B</i>  | del     | 1.19  |
|                         |                  |                         |                |                    | <i>ATRX</i> | del              | 0.98    |       |

SNV: single nucleotide variant; CNV: copy number variation; VAF: variant allele frequency; CN: copy number.

<sup>a</sup>: variants predicted to be pathogenic based on MutationTaster (<https://www.mutationtaster.org/>), COSMIC (<https://cancer.sanger.ac.uk/cosmic>) and IARC (<https://tp53.isb-cgc.org/>) databases.

<sup>b</sup>: CNV predicted to be pathogenic based on OncoKB™ (<http://www.oncokb.org/>).

<sup>c</sup>: non-canonical IDH2 variant, not used to define IDH2-mutant tumors.

Complete NGS analysis is reported in Supplementary Data 1.

**Supplementary Table S11 (related to Fig. 4C).** Cohort 2, genetic alterations in LP-CSF cfDNA and cellular DNA (ITEC protocol).

| Sample ID           | VAF (%)            |                           |                    |                           |                    |                           | CN                 |                           |                    |                           |
|---------------------|--------------------|---------------------------|--------------------|---------------------------|--------------------|---------------------------|--------------------|---------------------------|--------------------|---------------------------|
|                     | IDH1 p.R132H       |                           | pTERT c.1-124C>T   |                           | pTERT c.1-146C>T   |                           | EGFR               |                           | CDKN2A             |                           |
|                     | cfDNA <sup>a</sup> | cellular DNA <sup>b</sup> |
| MG1926              | failed             | N/A                       | n.a.               | N/A                       | n.a.               | N/A                       | n.a.               | N/A                       | n.a.               | N/A                       |
| MG1927_rec          | 48.00              | N/A                       | -                  | N/A                       | -                  | N/A                       | -                  | N/A                       | 1.06               | N/A                       |
| MG1928              | failed             | N/A                       | n.a.               | N/A                       | n.a.               | N/A                       | n.a.               | N/A                       | n.a.               | N/A                       |
| MG1938              | 0.00               | 0.00                      | 17.00              | 0.00                      | -                  | -                         | -                  | -                         | -                  | -                         |
| MG1942_rec          | 0.00               | 0.00                      | 11.80              | 0.00                      | -                  | -                         | -                  | -                         | -                  | -                         |
| MG1943              | 0.00               | 0.00                      | failed             | 0.00                      | n.a.               | 0.00                      | n.a.               | 1.84                      | -                  | -                         |
| MG1944              | 0.00               | 0.00                      | failed             | 0.00                      | n.a.               | 0.00                      | n.a.               | 2.67                      | -                  | -                         |
| MG1945              | 0.00               | 0.00                      | 11.43              | failed                    | -                  | n.a.                      | -                  | n.a.                      | -                  | -                         |
| MG2046 <sup>c</sup> | 0.00               | 0.00                      | 9.62               | 0.00                      | -                  | -                         | -                  | -                         | -                  | -                         |
| MG2047              | 0.00               | 0.00                      | 0.00               | 0.00                      | 0.00               | 0.00                      | failed             | 1.83                      | -                  | -                         |
| MG2048              | 0.00               | 0.00                      | 12.49              | 5.57                      | -                  | -                         | -                  | -                         | -                  | -                         |
| MG2049              | 0.00               | 0.00                      | 0.00               | 0.00                      | failed             | 0.00                      | n.a.               | 1.95                      | -                  | -                         |
| MG2049_rec          | 0.00               | 0.00                      | 16.40              | 0.00                      | -                  | -                         | -                  | -                         | -                  | -                         |
| MG2050              | 0.00               | 0.00                      | 0.00               | 0.00                      | 11.75              | 0.00                      | -                  | -                         | -                  | -                         |
| MG2051              | 0.00               | 0.00                      | 0.00               | 0.00                      | 0.00               | 0.00                      | 1.97               | 2.05                      | -                  | -                         |
| MG2052              | 0.00               | 0.00                      | 0.00               | 0.00                      | failed             | failed                    | n.a.               | n.a.                      | -                  | -                         |
| MG2053              | 0.00               | 0.00                      | 5.87               | 0.00                      | -                  | -                         | -                  | -                         | -                  | -                         |
| MG2054              | 0.00               | 0.00                      | 0.00               | 0.00                      | 7.90               | 0.00                      | -                  | -                         | -                  | -                         |
| MG2055_rec          | 0.00               | 0.00                      | failed             | 0.00                      | n.a.               | 0.00                      | n.a.               | 1.83                      | -                  | -                         |
| MG2056              | 0.00               | 0.00                      | 0.00               | 0.00                      | 0.00               | 0.00                      | 1.88               | 1.94                      | -                  | -                         |
| MG2057              | 0.00               | 0.00                      | 8.68               | 0.00                      | -                  | -                         | -                  | -                         | -                  | -                         |
| MG2058_rec          | 0.00               | 0.00                      | failed             | 0.00                      | n.a.               | 0.00                      | n.a.               | -                         | -                  | -                         |
| MG2059              | 0.00               | 0.00                      | failed             | 0.00                      | n.a.               | 0.00                      | n.a.               | -                         | -                  | -                         |
| MG2060              | 0.00               | 0.00                      | failed             | 0.00                      | n.a.               | 0.00                      | n.a.               | 2.05                      | -                  | -                         |
| MG2061              | 0.00               | 0.00                      | 34.20              | 0.00                      | -                  | -                         | -                  | -                         | -                  | -                         |
| MG2062_rec          | 0.00               | 0.00                      | 10.90              | 0.00                      | -                  | -                         | -                  | -                         | -                  | -                         |
| MG2063              | 0.00               | 0.00                      | 24.70              | 0.00                      | -                  | -                         | -                  | -                         | -                  | -                         |
| MG2064              | 0.00               | 0.00                      | 1.14               | 0.00                      | -                  | -                         | -                  | -                         | -                  | -                         |
| MG2065              | 0.00               | 0.00                      | 38.31              | 0.00                      | -                  | -                         | -                  | -                         | -                  | -                         |
| MG2166              | 0.00               | 0.00                      | 5.26               | 0.14                      | -                  | -                         | -                  | -                         | -                  | -                         |
| MG2168              | failed             | 0.00                      | n.a.               | 0.00                      | n.a.               | 0.00                      | n.a.               | 1.93                      | -                  | -                         |
| MG2169              | 0.00               | 0.00                      | 6.24               | 0.00                      | -                  | -                         | -                  | -                         | -                  | -                         |
| MG2170              | 0.00               | 0.00                      | 35.00              | 3.37                      | -                  | -                         | -                  | -                         | -                  | -                         |
| MG2171              | 0.00               | 0.00                      | 0.00               | 0.00                      | 0.00               | 0.00                      | 2.14               | 2.53                      | -                  | -                         |
| MG2172              | 0.00               | 0.00                      | 5.71               | 0.00                      | -                  | -                         | -                  | -                         | -                  | -                         |
| MG2173              | 0.00               | 0.00                      | failed             | 39.60                     | -                  | -                         | -                  | -                         | -                  | -                         |
| MG2177              | 0.00               | 0.00                      | 9.52               | 0.00                      | -                  | -                         | -                  | -                         | -                  | -                         |
| MG2179              | 0.00               | 0.00                      | 8.07               | 0.00                      | -                  | -                         | -                  | -                         | -                  | -                         |

VAF: variant allele frequency; CN: copy number.

-: not assessed, after protocol termination.

n.a.: not assessed after protocol failure.

N/A: not available sample.

<sup>a</sup>: cfDNA extracted from LP-CSF supernatant.

<sup>b</sup>: cellular DNA extracted from LP-CSF pellet.

<sup>c</sup>: patient with LP-CSF collected 2 months after surgery.

**Supplementary Table S12 (related to Fig. 4F and G).** Cohort 2, progression free survival and overall survival of first diagnosis GBM IDH-wt.

| Sample ID           | PFS (days) | OS (days) | Alive <sup>a</sup> | CSF DNA informative |
|---------------------|------------|-----------|--------------------|---------------------|
| MG1926              | 411        | 710       | no                 | no                  |
| MG1938              | 289        | 255       | no                 | yes                 |
| MG1944              | 525        | 646       | no                 | no                  |
| MG1945              | 126        | 856       | yes                | yes                 |
| MG2046 <sup>b</sup> | 0          | 28        | no                 | yes                 |
| MG2047              | 391        | 410       | no                 | no                  |
| MG2048              | 107        | 239       | no                 | yes                 |
| MG2049              | 263        | 438       | no                 | no                  |
| MG2050              | 95         | 500       | no                 | yes                 |
| MG2051              | N/A        | 725       | yes                | no                  |
| MG2052              | 90         | 350       | no                 | no                  |
| MG2053              | 102        | 102       | no                 | yes                 |
| MG2054              | N/A        | 18        | no                 | yes                 |
| MG2056              | 282        | 689       | no                 | no                  |
| MG2057              | 276        | 304       | no                 | yes                 |
| MG2059              | 132        | 206       | no                 | no                  |
| MG2060              | 175        | 462       | no                 | no                  |
| MG2061              | N/A        | 86        | no                 | yes                 |
| MG2063              | 261        | 505       | yes                | yes                 |
| MG2065              | 249        | 459       | no                 | yes                 |
| MG2166              | 240        | 374       | no                 | yes                 |
| MG2169              | 234        | 418       | no                 | yes                 |
| MG2170              | 23         | 64        | no                 | yes                 |
| MG2171              | N/A        | 431       | yes                | no                  |
| MG2172              | 127        | 257       | no                 | yes                 |
| MG2177              | 306        | 380       | yes                | yes                 |
| MG2179              | 166        | 317       | yes                | yes                 |

PFS: progression free survival; OS: overall survival.

N/A: not available.

<sup>a</sup>: July 1, 2022.

<sup>b</sup>: patient excluded from PFS and OS analysis as he underwent LP-CSF after surgery.



**Supplementary Table S13 (related to Fig. 5B and C).** Cohort 1 and 2, *MGMT* promoter methylation analysis in tumor and CSF.

| Sample ID                     |            | <i>MGMT</i> methylation (%) |                    |
|-------------------------------|------------|-----------------------------|--------------------|
|                               |            | Tumor DNA <sup>a</sup>      | cfDNA <sup>b</sup> |
| Cohort 1<br>(peritumoral CSF) | CT025      | 37.90                       | 53.30              |
|                               | CT027      | 14.40                       | 74.10              |
|                               | CT046      | 5.10                        | 5.50               |
|                               | CT047      | 0.00                        | 0.10               |
|                               | CT053      | 0.30                        | 0.00               |
|                               | CT062      | 2.40                        | 7.30               |
|                               | CT076      | 0.30                        | 0.20               |
|                               | CT082      | 1.20                        | 3.10               |
|                               | CT085      | 87.70                       | 35.00              |
|                               | CT087      | 43.60                       | 30.70              |
| Cohort 2<br>(LP-CSF)          | MG1927_rec | 45.00                       | 49.90              |
|                               | MG1942_rec | 6.00                        | 2.08               |
|                               | MG2046     | 2.00                        | 0.74               |
|                               | MG2048     | 3.00                        | 0.00               |
|                               | MG2049_rec | 6.00                        | 2.50               |
|                               | MG2061     | 4.00                        | 0.00               |
|                               | MG2063     | 4.00                        | 0.03               |
|                               | MG2065     | 43.00                       | 3.10               |
|                               | MG2177     | 4.00                        | 11.60              |

<sup>a</sup>: *MGMT* methylation measured by methyl-beaming PCR in Cohort 1 and by pyrosequencing in Cohort 2.

<sup>b</sup>: *MGMT* methylation measured by methyl-beaming in both Cohorts.

## **Description of Supplementary Data 1-3 (separate .xlsx files).**

### **Supplementary Data 1 (related to Materials and Methods)**

#### **Primers and probes used during this study.**

Sheet 1 – primers for Sanger sequencing; for each sequenced amplicon, columns report: (A) gene name; (B) gene accession number; (C) oligo ID; (D) reference transcript; (E) oligonucleotide sequence (5'-3'); (F) template.

Sheet 2 – Custom primer-probes for CNV; for each target gene, columns report: (A) gene name; (B) primer 1 sequences (5'-3'); (C) primer 2 sequences (5'-3'); (D) probe sequence reporter and quencher; (E) distributor.

Sheet 3 – Methyl beaming oligos: oligonucleotide sequences used during the multiple stages of DNA amplification for the detection of *MGMT* methylation by Beaming PCR. (A) gene name; (B) oligo ID; (C) oligonucleotide sequence (5'-3').

### **Supplementary Data 2 (related to Fig. 2I and 3G, Supplementary Fig. S3)**

#### **Mutations (SNVs and InDels) found in tumor tissues and CSF by NGS Analysis – Complete Datasets (Cohort 1 and 2).**

Sheet 1 – NGS panel design: list of genes included in the design.

Sheets 2 and 3 – Variants identified in Cohort 1 (sheet 2) and in Cohort 2 (sheet 3). Columns report: (A) the case in which the mutation has been detected; (B) the altered gene; (C) the reference transcript used for annotation of identified variants; (D) the nucleotide change mapped on the coding sequence; (E) the corresponding amino acid change mutation; (F-H) observed VAF in different biological samples (cfDNA, cellular DNA, and tumor DNA); (I-J) COSMIC identifier according to COSMIC v96, released 31-MAY-22 and number of mutant cases; (K-L) variant classification according to MutationTaster2021 and relative permanent link generated after prediction.

### **Supplementary Data 3 (related to Fig. 3G)**

#### **Single Nucleotide Polymorphism (SNP) for each matched tumor and LP-CSF (Cohort 2).**

Sheet 1 – Haplotypes: for each SNP columns report observed haplotypes in every sequenced DNA sample. Data were used to evaluate concordance between samples as shown in Sheet 2.

Sheet 2 – Percentage of correlation between samples.

## **Supplementary Materials and Methods.**

### **PCR and Sanger Sequencing conditions**

In tumor gDNA samples (Cohort 1), *IDH1/2* and *TERT* promoter (*pTERT*) hotspot mutations, and *TP53* and *PTEN* full-length sequences were analyzed by Sanger Sequencing. *IDH1/2*, *TP53*, *PTEN* were amplified using Platinum® Taq DNA Polymerase (ThermoFisher) and specific primer pairs (Supplementary Data 3). PCR conditions were as follows: 95°C for 3'; 3 × [95°C for 15'', 64°C for 30'', and 70°C for 1']; 3 × [95°C for 15'', 61°C for 30'', and 70°C for 1']; 3 × [95°C for 15'', 58°C for 30'', and 70°C for 1']; 37 × [95°C for 15'', 57°C for 30'', and 70°C for 1']; and 70°C for 5'. *pTERT* was amplified using 2x Phanta Max Master Mix (Vazyme) and specific primer pairs (Supplementary Data 3). PCR conditions were as follows: 95°C for 3'; 40 × [95°C for 15'', 63.9°C for 15'', and 72°C for 30'']; and 72°C for 3'. PCR products were purified using illustra™ ExoProStar 1-Step (Merck) according to manufacturer's instructions. Cycle sequencing was performed using BigDye Terminator v3.1 Cycle Sequencing kit (ThermoFisher). Sequencing products were purified using CleanSEQ Dye-Terminator Removal Kit (Beckman Coulter) and analyzed with a 3730 DNA Analyzer ABI capillary electrophoresis system (ThermoFisher).

### **Primary cell cultures and artificial CSF composition**

Neurospheres (BT205, BT328, CT025 and CT151) were derived from surgical tissue samples of primary GBMs (according to a protocol approved by the institutional Ethical Committee) as previously described (1). BT205 and BT328 were grown in standard NS medium containing human EGF (20 ng/ml, Merck) and FGF2 (20 ng/ml, PeproTech); for CT025 and CT151 HGF (20 ng/ml), PDGF/BB (20 ng/ml, PeproTech) were added to standard medium. Neurospheres were tested monthly for being Mycoplasma free and were used between p10 and p20. For assessing cell viability in CSF, an artificial cerebrospinal fluid (aCSF) was prepared mimicking the Elliott's B solution with addition of BSA [(NaCl 73 mg + NaHCO<sub>3</sub> 19 mg + D-Glucose 8 mg + MgSO<sub>4</sub>×H<sub>2</sub>O 3.45 mg + KCl 3 mg + CaCl<sub>2</sub>×2H<sub>2</sub>O 2.65 mg + K<sub>2</sub>HPO<sub>4</sub> 2 mg+ BSA 2.5 mg)/10 ml; pH7.3] (2), and NS were plated in either NS medium or aCSF. Cell viability was measured using Tripan Blue Stain (0.4%; ThermoFisher) at the indicated time points following manufacturer's instructions. Medium or aCSF were collected at the indicated time points and were assessed as described in the Materials and Methods session.

### **Assessment of ddPCR linearity**

In order to assess ddPCR linearity of *IDH1* (p.R132H), *TERT* c.1-124C>T and c.1-146 C>T assays in the presence of reduced DNA concentrations, we performed serial dilutions of DNA template starting from 5 ng DNA/reaction. ddPCR reactions were performed as described in the Materials and Methods section. Linearity has been measured (i) comparing observed vs. expected DNA concentration of a control DNA (wild-type for the searched alterations) and (ii) comparing VAF consistency across multiple serial DNA dilutions.

### **Analysis of MGMT promoter methylation**

Bisulfite conversion of DNA extracted from tumors or CSF was performed by EZ DNA methylation Gold kit (Zymo Research). *MGMT* methylation was assessed via methyl-BEAMing digital PCR according to Li et al. (3). A first amplification allows the enrichment of the locus of interest and is carried out using tagged primers (see Supplementary Data 3). Amplicons are then diluted (1/16000) and resubjected in emulsion to PCR amplification using the tag and tag-coated-beads, allowing the physical separation and independent amplification of the different templates. PCR mixes are prepared according to (4). Next, amplicons are hybridized with fluorescent probes specific for the methylated or unmethylated bisulfite-converted templates and fluorescence is assessed by an Accuri C6 flow cytometer (BD). The percentage of methylation is calculated by dividing the number of methylated specific events by the sum of methylated plus unmethylated specific events. A minimum of 200 cumulative events (methylated + unmethylated) are required. *MGMT* promoter methylation in Cohort 2 tumor DNA was performed on 10 CpG islands located in the first exon of the gene by pyrosequencing using the *MGMT* plus kit (Diatech Pharmacogenetics) according to manufacturer's instructions. The biological samples is considered methylated if the CpG island methylation average is >10%.

## Key resource table

| Reagent or resource                                                                                                                                                                                                           | Source                       | Identifier                                                                                                      |
|-------------------------------------------------------------------------------------------------------------------------------------------------------------------------------------------------------------------------------|------------------------------|-----------------------------------------------------------------------------------------------------------------|
| QIAamp® MinElute® ccfDNA Mini Kit                                                                                                                                                                                             | Qiagen                       | 55284                                                                                                           |
| ReliaPrep™ gDNA Tissue Miniprep System                                                                                                                                                                                        | Promega                      | A2051                                                                                                           |
| Maxwell® RSC DNA FFPE Kit                                                                                                                                                                                                     | Promega                      | AS1450                                                                                                          |
| Qubit™ dsDNA HS Assay Kit                                                                                                                                                                                                     | ThermoFisher                 | Q32854                                                                                                          |
| Qubit™ dsDNA BR Assay Kit                                                                                                                                                                                                     | ThermoFisher                 | Q32853                                                                                                          |
| Agilent High Sensitivity DNA Kit                                                                                                                                                                                              | Agilent                      | 5067-4626                                                                                                       |
| IDH1/2 status kit                                                                                                                                                                                                             | Diatech Pharmacogenetics     | UP045                                                                                                           |
| EGFR/CEN7 dual-color probes                                                                                                                                                                                                   | ZytoVision GmbH              | Z-2033                                                                                                          |
| MGMT plus kit                                                                                                                                                                                                                 | Diatech Pharmacogenetics     | UP050                                                                                                           |
| Platinum® Taq DNA Polymerase                                                                                                                                                                                                  | ThermoFisher                 | 10966034                                                                                                        |
| 2x Phanta Max Master Mix                                                                                                                                                                                                      | Vazyme                       | P515-01                                                                                                         |
| illustra™ ExoProStar 1-Step                                                                                                                                                                                                   | Merk                         | GEUS77705                                                                                                       |
| BigDye Terminator v3.1 Cycle Sequencing kit                                                                                                                                                                                   | ThermoFisher                 | 4337455                                                                                                         |
| CleanSEQ Dye-Terminator Removal Kit                                                                                                                                                                                           | Beckman Coulter              | A29151                                                                                                          |
| TaqMan™ Universal PCR Master Mix                                                                                                                                                                                              | ThermoFisher                 | 4304437                                                                                                         |
| ddPCR Supermix for Probes (No dUTP)                                                                                                                                                                                           | Bio-Rad                      | 1863023                                                                                                         |
| Tripin Blue Stain                                                                                                                                                                                                             | ThermoFisher                 | 15250-61                                                                                                        |
| anti-IDH1 R132H mouse monoclonal antibody (Clone H09)                                                                                                                                                                         | Dianova                      | RRID: AB_2335716                                                                                                |
| <b>Software and Algorithms</b>                                                                                                                                                                                                |                              |                                                                                                                 |
| Chromas Lite 2.01 software                                                                                                                                                                                                    | Technelysium                 | <a href="http://www.technelysium.com.au/chromas_lite.html">http://www.technelysium.com.au/chromas_lite.html</a> |
| COSMIC                                                                                                                                                                                                                        | Sanger Institute             | <a href="http://cancer.sanger.ac.uk/cosmic">http://cancer.sanger.ac.uk/cosmic</a>                               |
| IARC TP53 DATABASE                                                                                                                                                                                                            | De Andrade et al., 2022 (5)  | <a href="https://tp53.isb-cgc.org/">https://tp53.isb-cgc.org/</a>                                               |
| MutationTaster2021                                                                                                                                                                                                            | Steinhaus et al., 2021 (6)   | <a href="https://www.genecascade.org/MutationTaster2021/">https://www.genecascade.org/MutationTaster2021/</a>   |
| OncoDNA                                                                                                                                                                                                                       | Lombardi et al., 2020 (7)    | <a href="http://www.oncodna.com">http://www.oncodna.com</a>                                                     |
| OncoKB™                                                                                                                                                                                                                       | Chakravarty et al., 2017 (8) | <a href="http://www.oncokb.org/">http://www.oncokb.org/</a>                                                     |
| <b>Deposited Data</b>                                                                                                                                                                                                         |                              |                                                                                                                 |
| Raw NGS data are available at the European Nucleotide Archive under project accession number PRJEB55332, study ERP140225 ( <a href="https://www.ebi.ac.uk/ena/browser/search">https://www.ebi.ac.uk/ena/browser/search</a> ). |                              |                                                                                                                 |
| <b>qPCR Probes for CNV analysis</b>                                                                                                                                                                                           |                              |                                                                                                                 |
| RNase P                                                                                                                                                                                                                       | ThermoFisher                 | 4403328                                                                                                         |
| PDGFRA                                                                                                                                                                                                                        | IDT                          | See Supplementary Data 3                                                                                        |
| CDK4                                                                                                                                                                                                                          | IDT                          | See Supplementary Data 3                                                                                        |
| CDKN2A                                                                                                                                                                                                                        | IDT                          | Hs.PT.58.14776964.g                                                                                             |
| EGFR                                                                                                                                                                                                                          | IDT                          | Hs.PT.58.27649789.g                                                                                             |
| APOA1                                                                                                                                                                                                                         | IDT                          | Hs.PT.56a.40574746.g                                                                                            |
| GREB1                                                                                                                                                                                                                         | IDT                          | Hs.PT.58.41000378.g                                                                                             |
| TERT                                                                                                                                                                                                                          | IDT                          | Hs.PT.58.24546260.g                                                                                             |
| <b>ddPCR probes</b>                                                                                                                                                                                                           |                              |                                                                                                                 |
| IDH1 p.R132H c.395G>A                                                                                                                                                                                                         | Bio-Rad                      | dHsaMDV2010055                                                                                                  |
| TERT C228T_113                                                                                                                                                                                                                | Bio-Rad                      | dHsaEXD72405942                                                                                                 |
| TERT C250T_113                                                                                                                                                                                                                | Bio-Rad                      | dHsaEXD46675715                                                                                                 |

|                                      |         |                  |
|--------------------------------------|---------|------------------|
| CDKN2A                               | Bio-Rad | dHsaCP1000581    |
| EGFR                                 | Bio-Rad | dHsaCP2500318    |
| TP53 p.R306*                         | Bio-Rad | dHsaMDV2510552   |
| PTEN p.R335* c.1003C>T               | Bio-Rad | dHsaMDS593814798 |
| PTEN p.T319fs*4<br>955_958delACTT c. | Bio-Rad | dHsaMDS563006064 |
| TP53 p.C275Y                         | Bio-Rad | dHsaMDS2511638   |
| TP53 p.R282W c.844C>T                | Bio-Rad | dHsaMDV2516902   |
| VOPP1                                | Bio-Rad | dHsaCP2506684    |
| ASL                                  | Bio-Rad | dHsaCP2506678    |
| AGO1 (EIF2C1)                        | Bio-Rad | dHsaCP2500349    |
| RPP30                                | Bio-Rad | dHsaCP2500350    |
| AP3B1                                | Bio-Rad | dHsaCP2500348    |

## Supplementary References

1. De Bacco F, Casanova E, Medico E, Pellegatta S, Orzan F, Albano R, et al. The MET oncogene is a functional marker of a glioblastoma stem cell subtype. *Cancer Res* 2012;72:4537-50.
2. Olmos-Jiménez R, Espuny-Miró A, Díaz-Carrasco MS, Fernández-Varón E, Valderrey-Pulido M, Cárceles-Rodríguez C. Stability of four standardized preparations of methotrexate, cytarabine, and hydrocortisone for intrathecal use. *J Oncol Pharm Pract* 2016;22:659-65.
3. Li M, Chen WD, Papadopoulos N, Goodman SN, Bjerregaard NC, Laurberg S, et al. Sensitive digital quantification of DNA methylation in clinical samples. *Nat Biotechnol* 2009;27:858-63.
4. Barault L, Amatu A, Bleeker FE, Moutinho C, Falcomatà C, Fiano V, et al. Digital PCR quantification of MGMT methylation refines prediction of clinical benefit from alkylating agents in glioblastoma and metastatic colorectal cancer. *Ann Oncol*. 2015;26:1994-9.
5. De Andrade KC, Lee EE, Tookmanian EM, Kesserwan CA, Manfredi JJ, Hatton JN, et al. The TP53 Database: transition from the International Agency for Research on Cancer to the US National Cancer Institute. *Cell Death Differ* 2022;29:1071-1073.
6. Steinhaus R, Proft S, Schuelke M, Cooper DN, Schwarz JM, Seelow D. MutationTaster2021. *Nucleic Acids Res* 2021;49:W446-W51.
7. Lombardi G, Barresi V, Indraccolo S, Simbolo M, Fassan M, Mandruzzato S, et al. Pembrolizumab Activity in Recurrent High-Grade Gliomas with Partial or Complete Loss of Mismatch Repair Protein Expression: A Monocentric, Observational and Prospective Pilot Study. *Cancers (Basel)* 2020;12:2283.
8. Chakravarty D, Gao J, Phillips SM, Kundra R, Zhang H, Wang J, et al. OncoKB: A Precision Oncology Knowledge Base. *JCO Precis Oncol* 2017;1:1-16.
